# Supplementary material for: Short and efficient diastereoselective synthesis of pyrrolidinone-containing dipeptide analogues
Source: Royal Society of Chemistry journal article supplement (doi:10.1039/b705093c), 2007-01-01

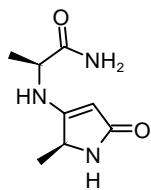

3a

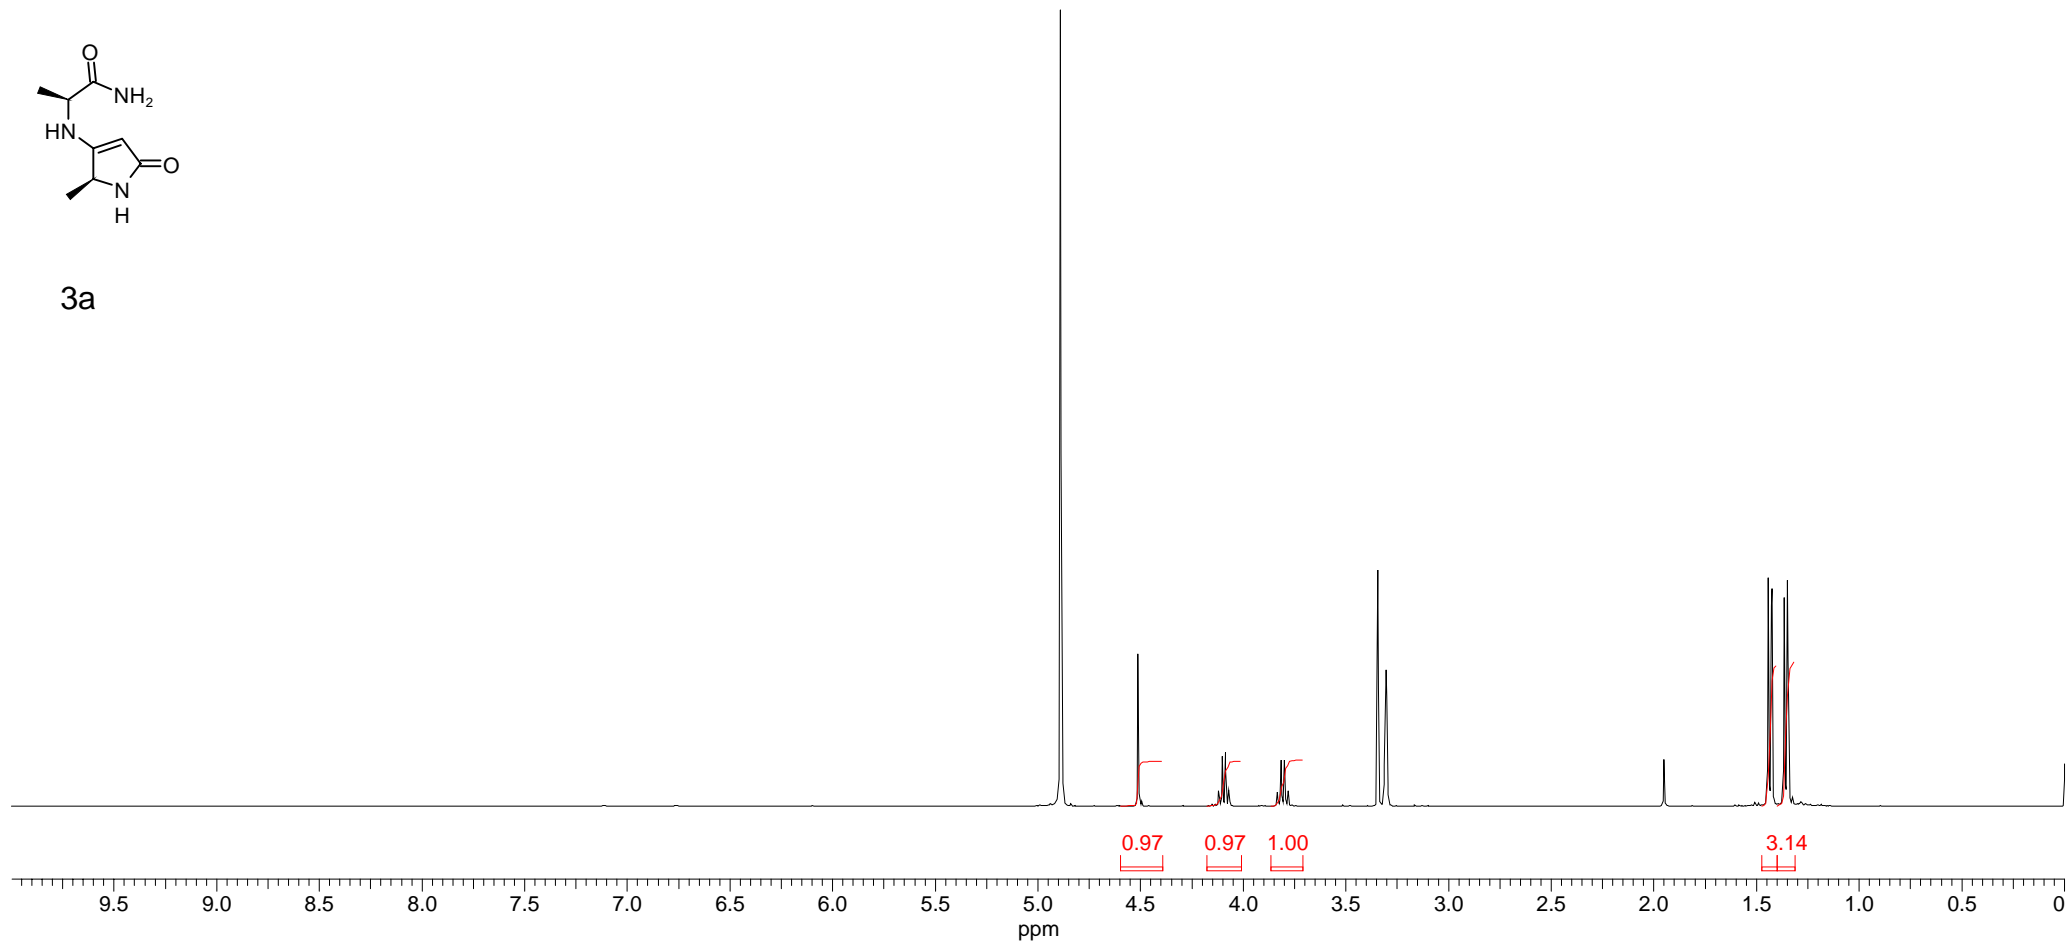

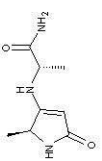

3a

PyAlaAla

179.319  
178.198  
170.575

87.544

55.518  
55.220  
50.261  
50.053  
49.839  
49.626  
49.414  
49.202  
48.987  
48.775

20.084  
18.861

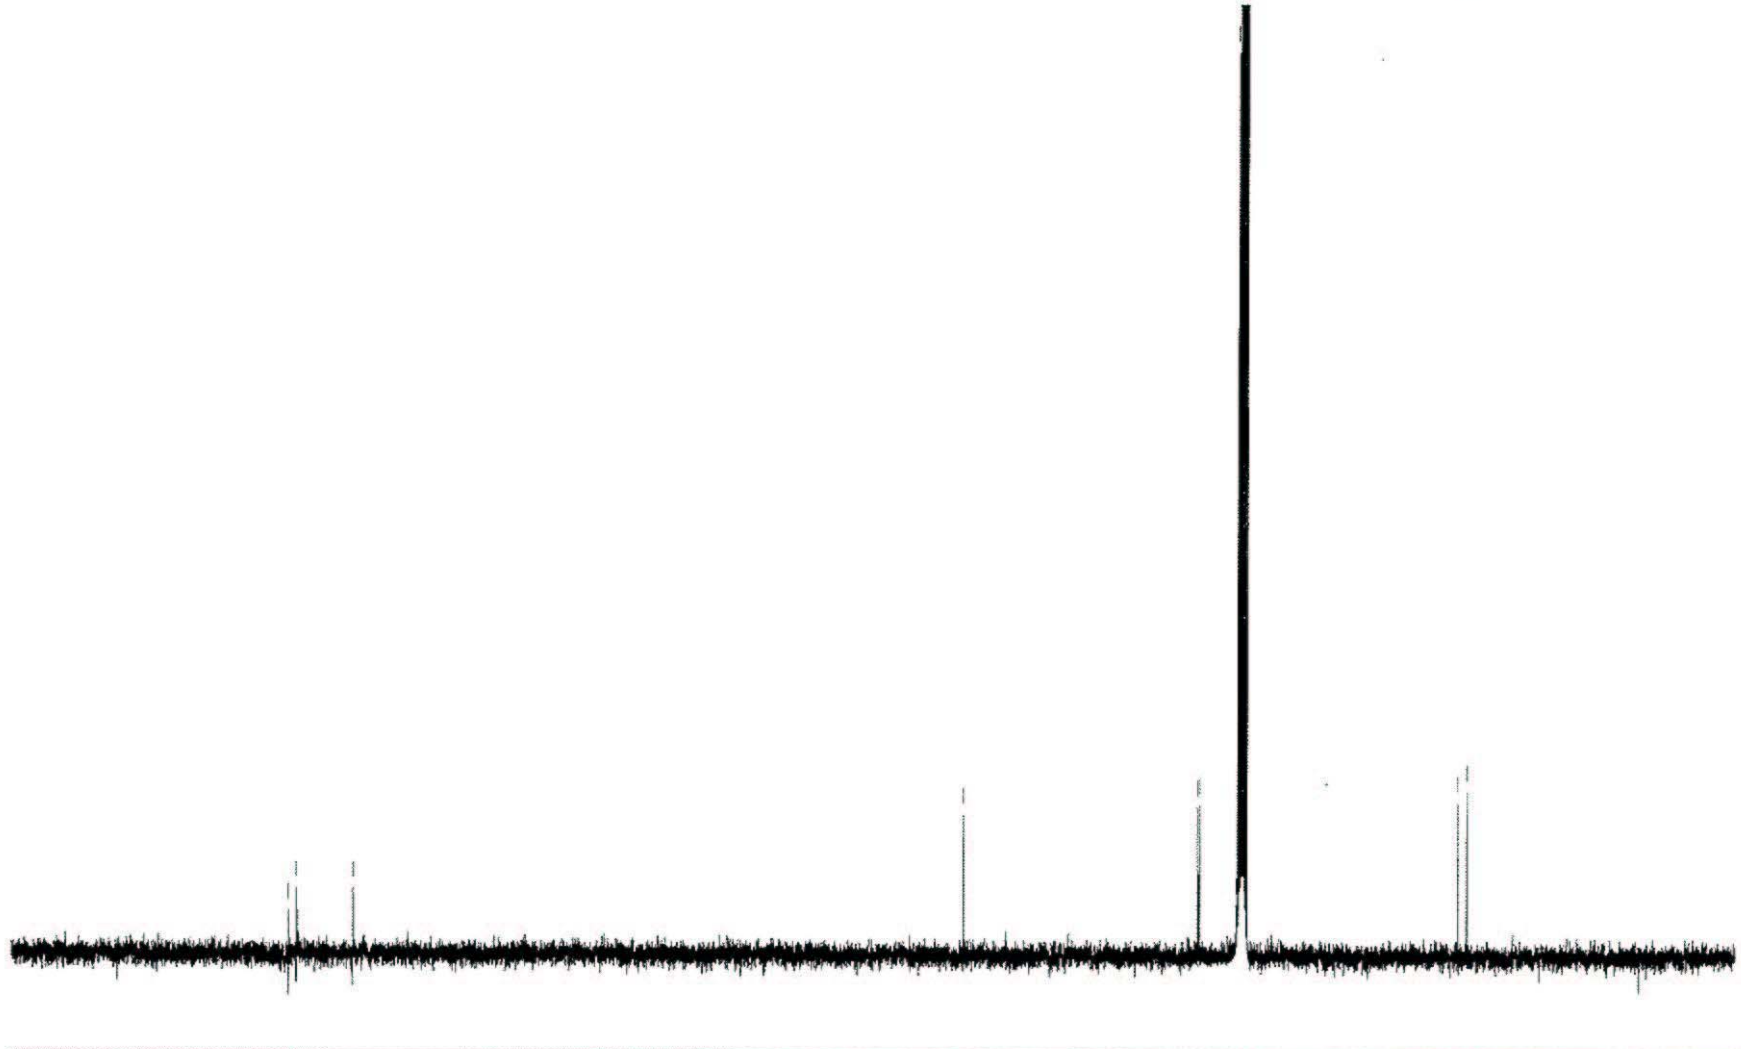

```

Current Data Parameters
NAME      Nov02-2006mhos
EXPNO     61
PROCNO    1

F2 - Acquisition Parameters
Date_     20061102
Time      17.42
INSTRUM   av400
PROBHD    5 mm QNP 1H/13
PULPROG   zgpg30
TD         65536
SOLVENT   MeOD
NS         256
DS         4
SWH        23980.814 Hz
FIDRES     0.365918 Hz
AQ         1.3664756 sec
RG         7298.2
DW         20.850 usec
DE         10.50 usec
TE         295.1 K
D1         5.00000000 sec
d11        0.03000000 sec
DELTA     4.90000010 sec
MCREST    0.00000000 sec
MCHPX     0.01500000 sec

***** CHANNEL f1 *****
NUC1       13C
P1         7.60 usec
PL1        -3.00 dB
SFO1       100.6227898 MHz

***** CHANNEL f2 *****
CPDPRG2    waltz16
NUC2       1H
PCPD2      80.00 usec
PL2        -3.00 dB
PL12       17.00 dB
PL13       17.00 dB
SFO2       400.1316005 MHz

F2 - Processing parameters
SI         32768
SF         100.6125861 MHz
WDW        RM
SSB        0
LB         1.00 Hz
GB         0
PC         1.40
  
```

210 200 190 180 170 160 150 140 130 120 110 100 90 80 70 60 50 40 30 20 10 0 -10 ppm

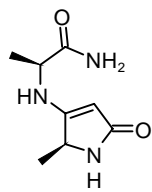

3a

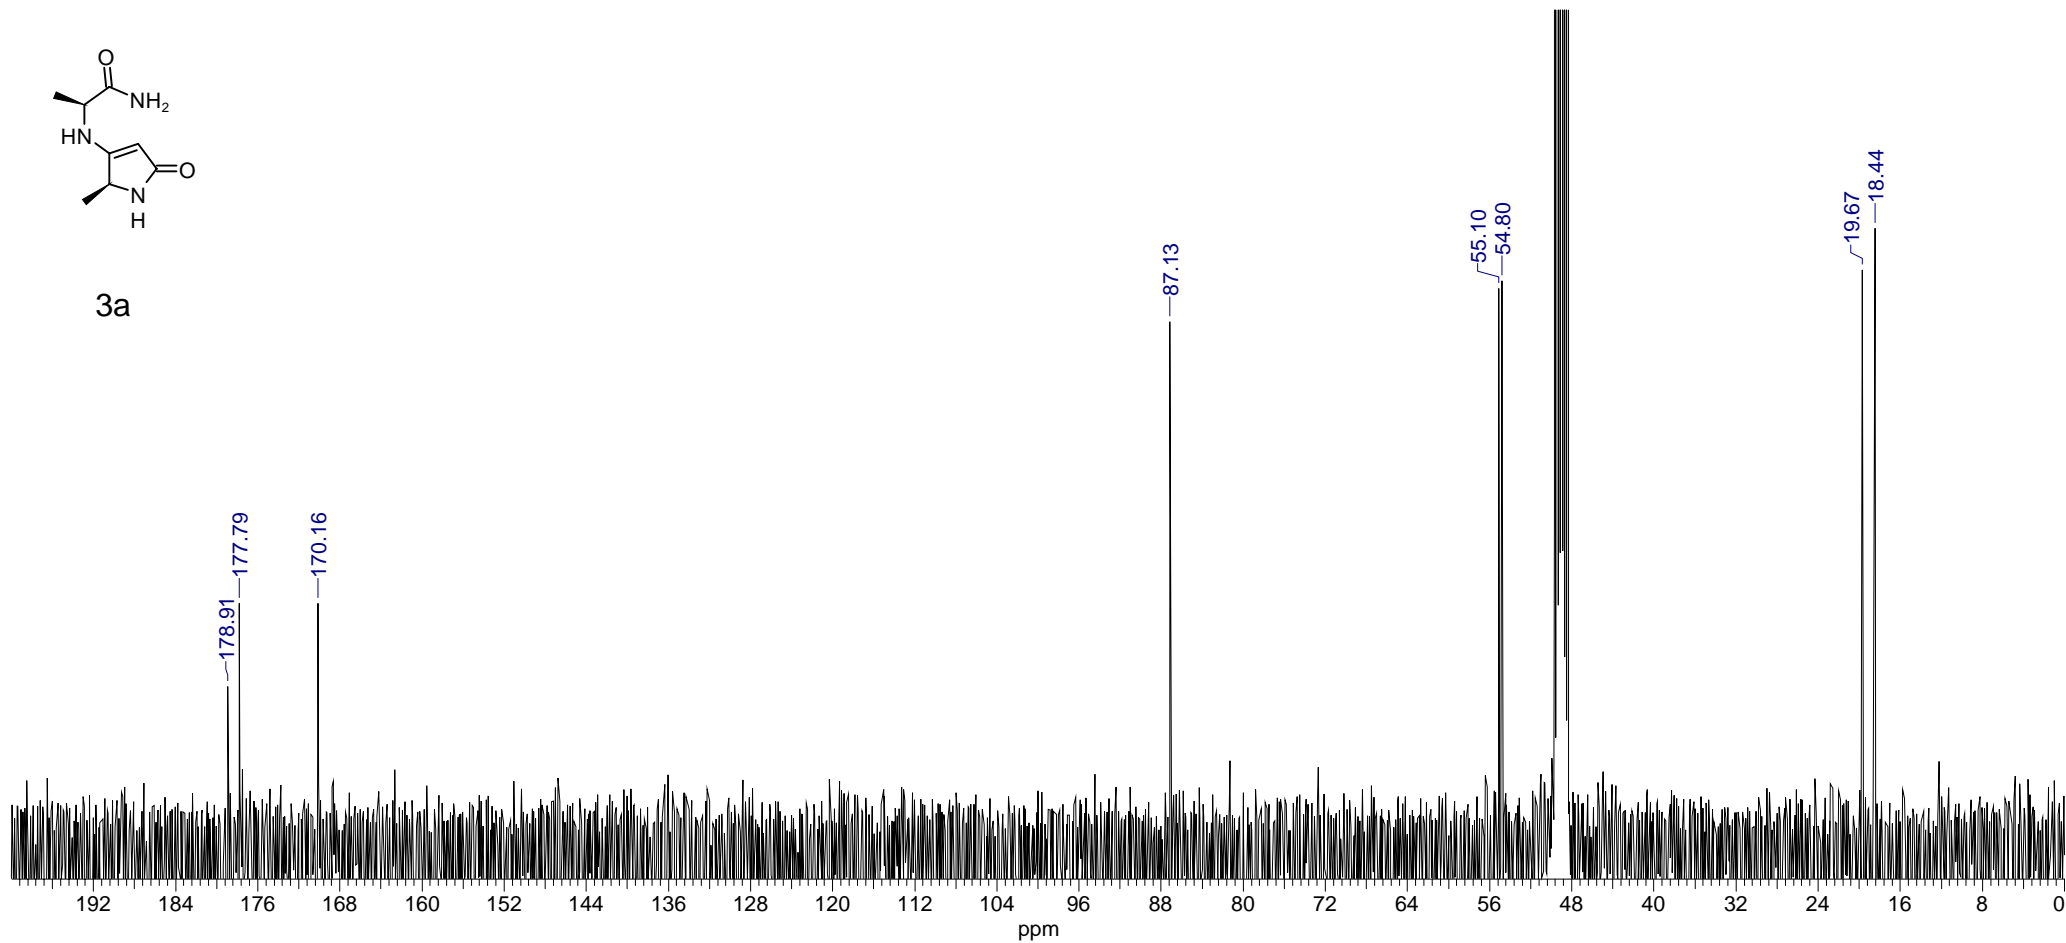

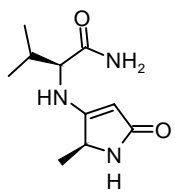

3b

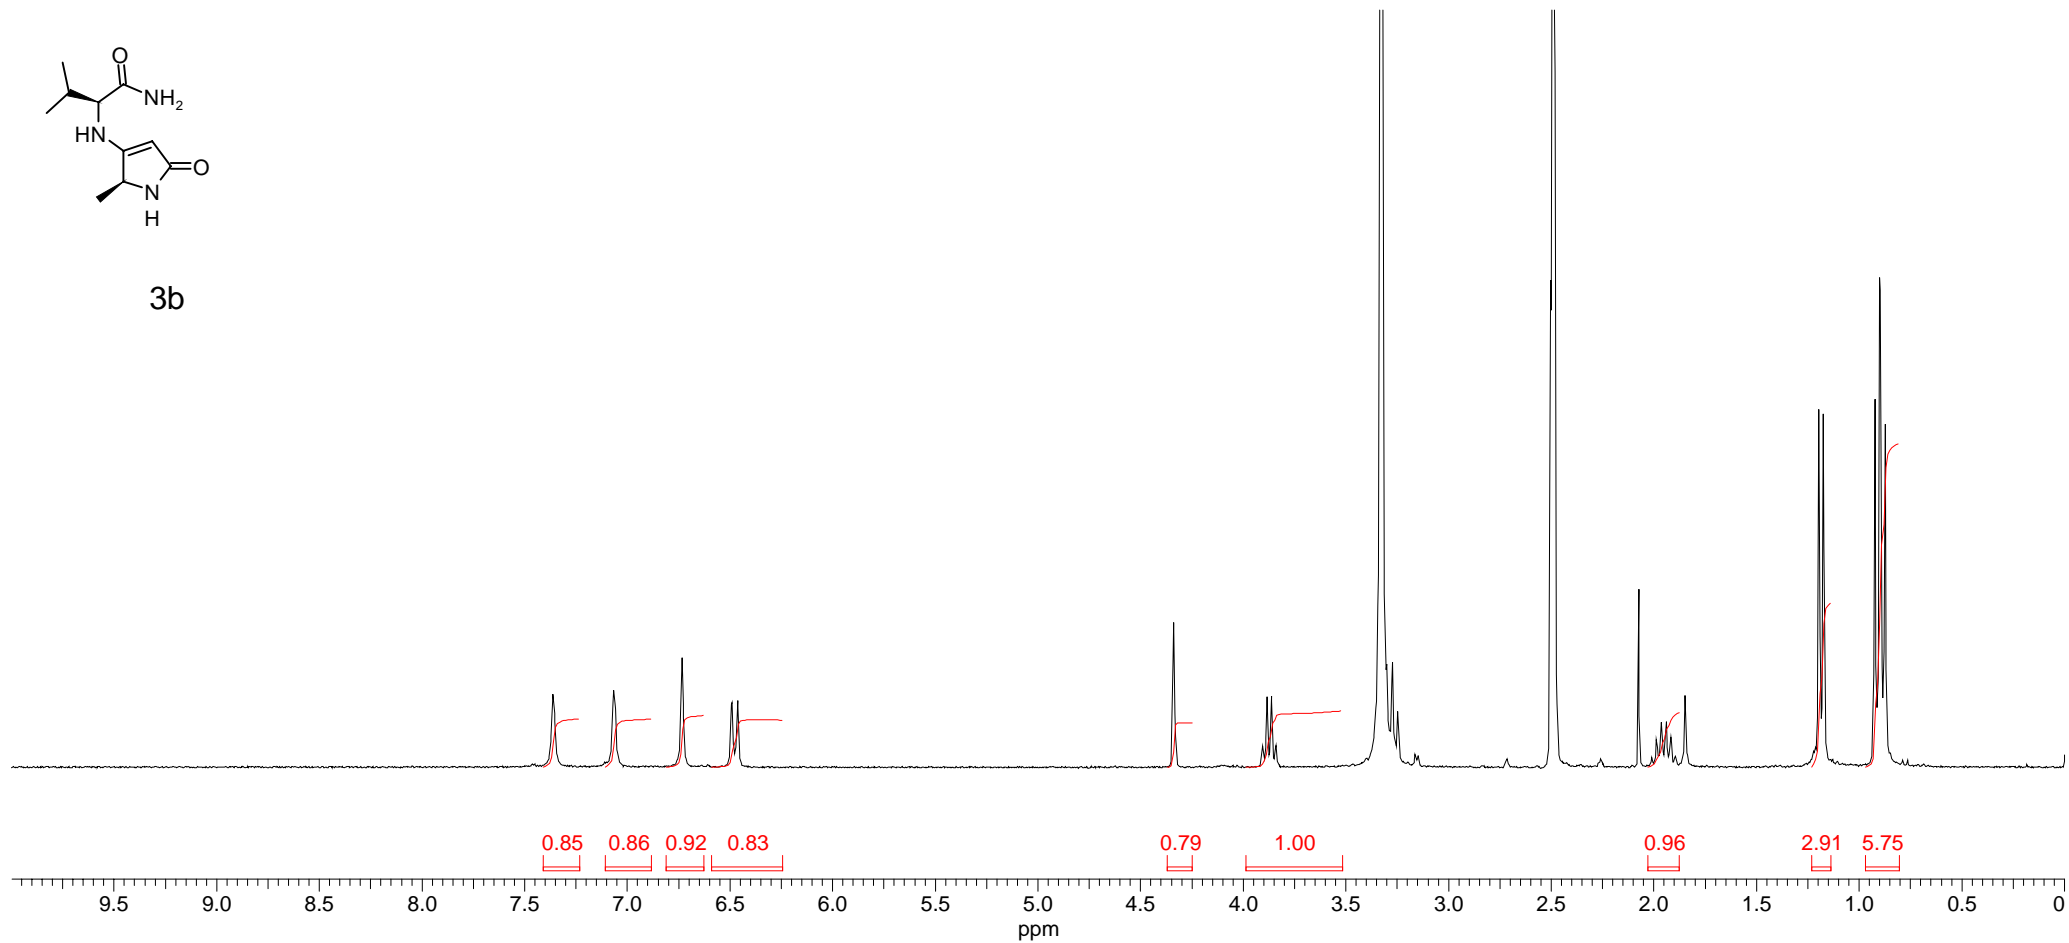

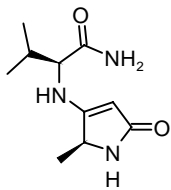

3b

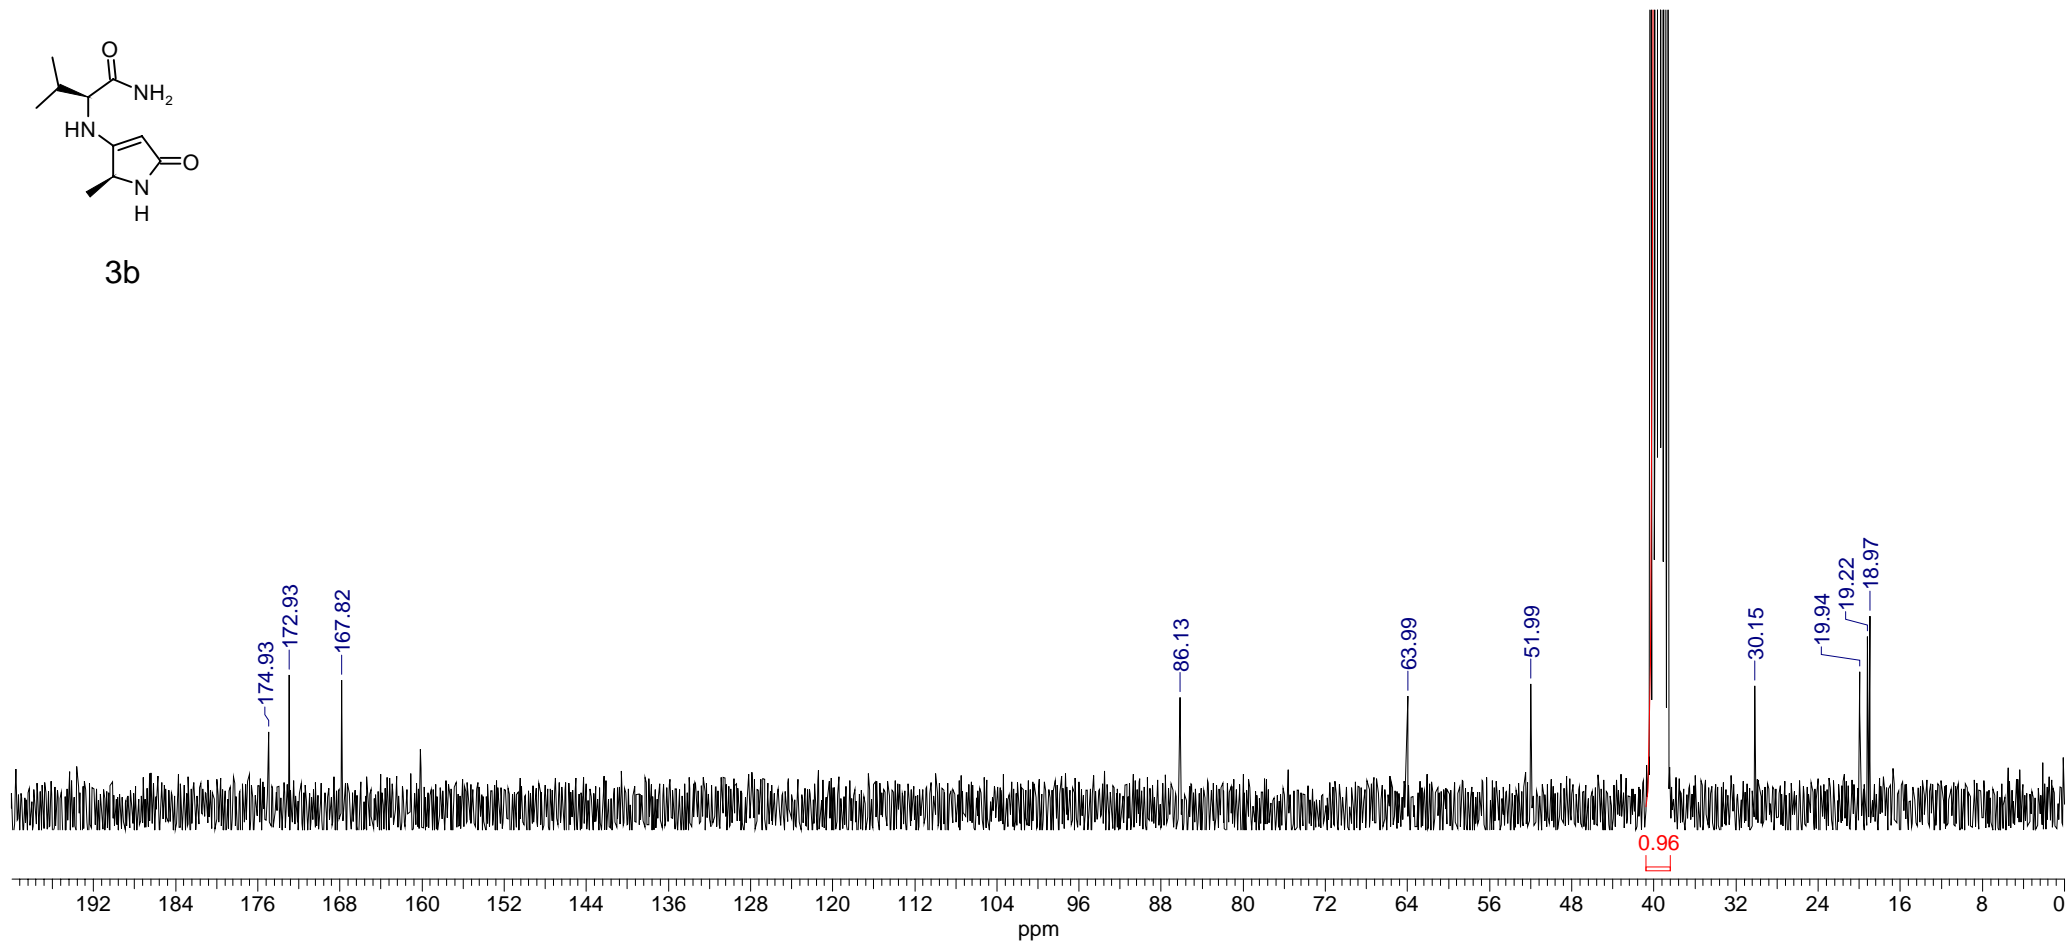

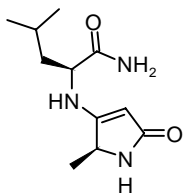

3c

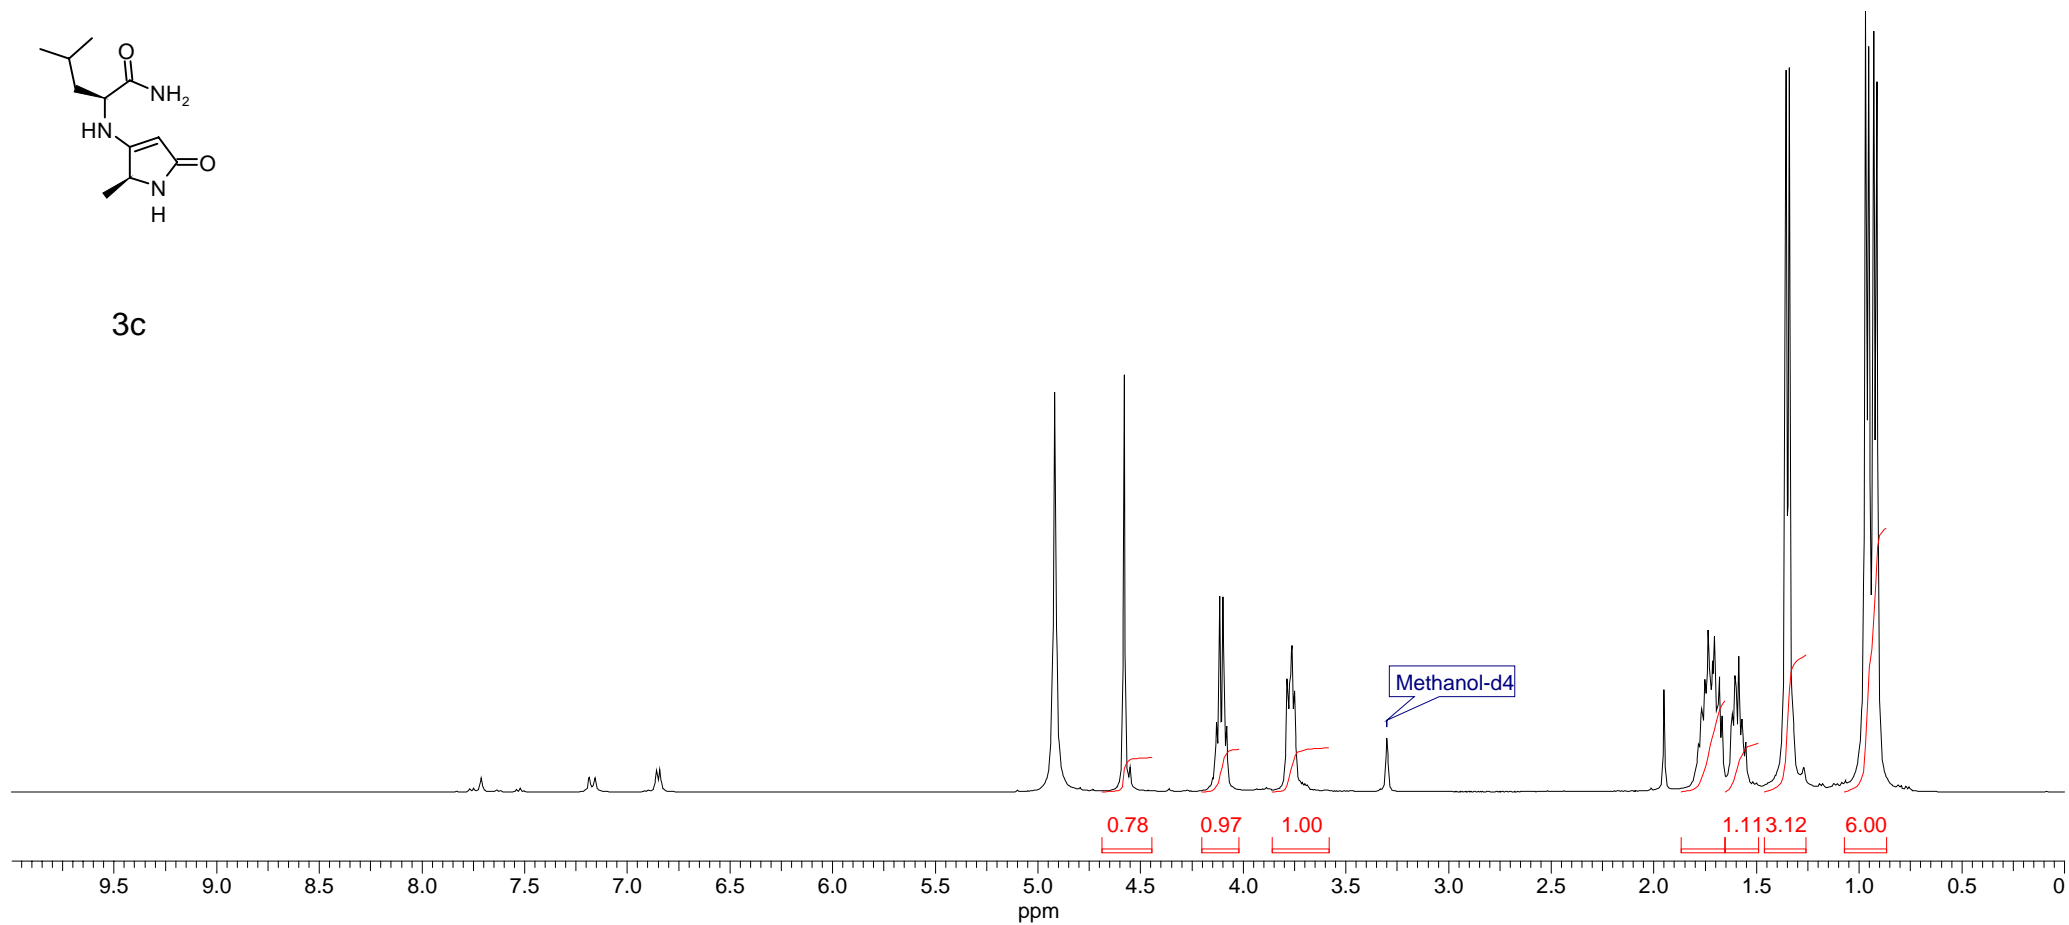

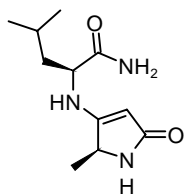

3c

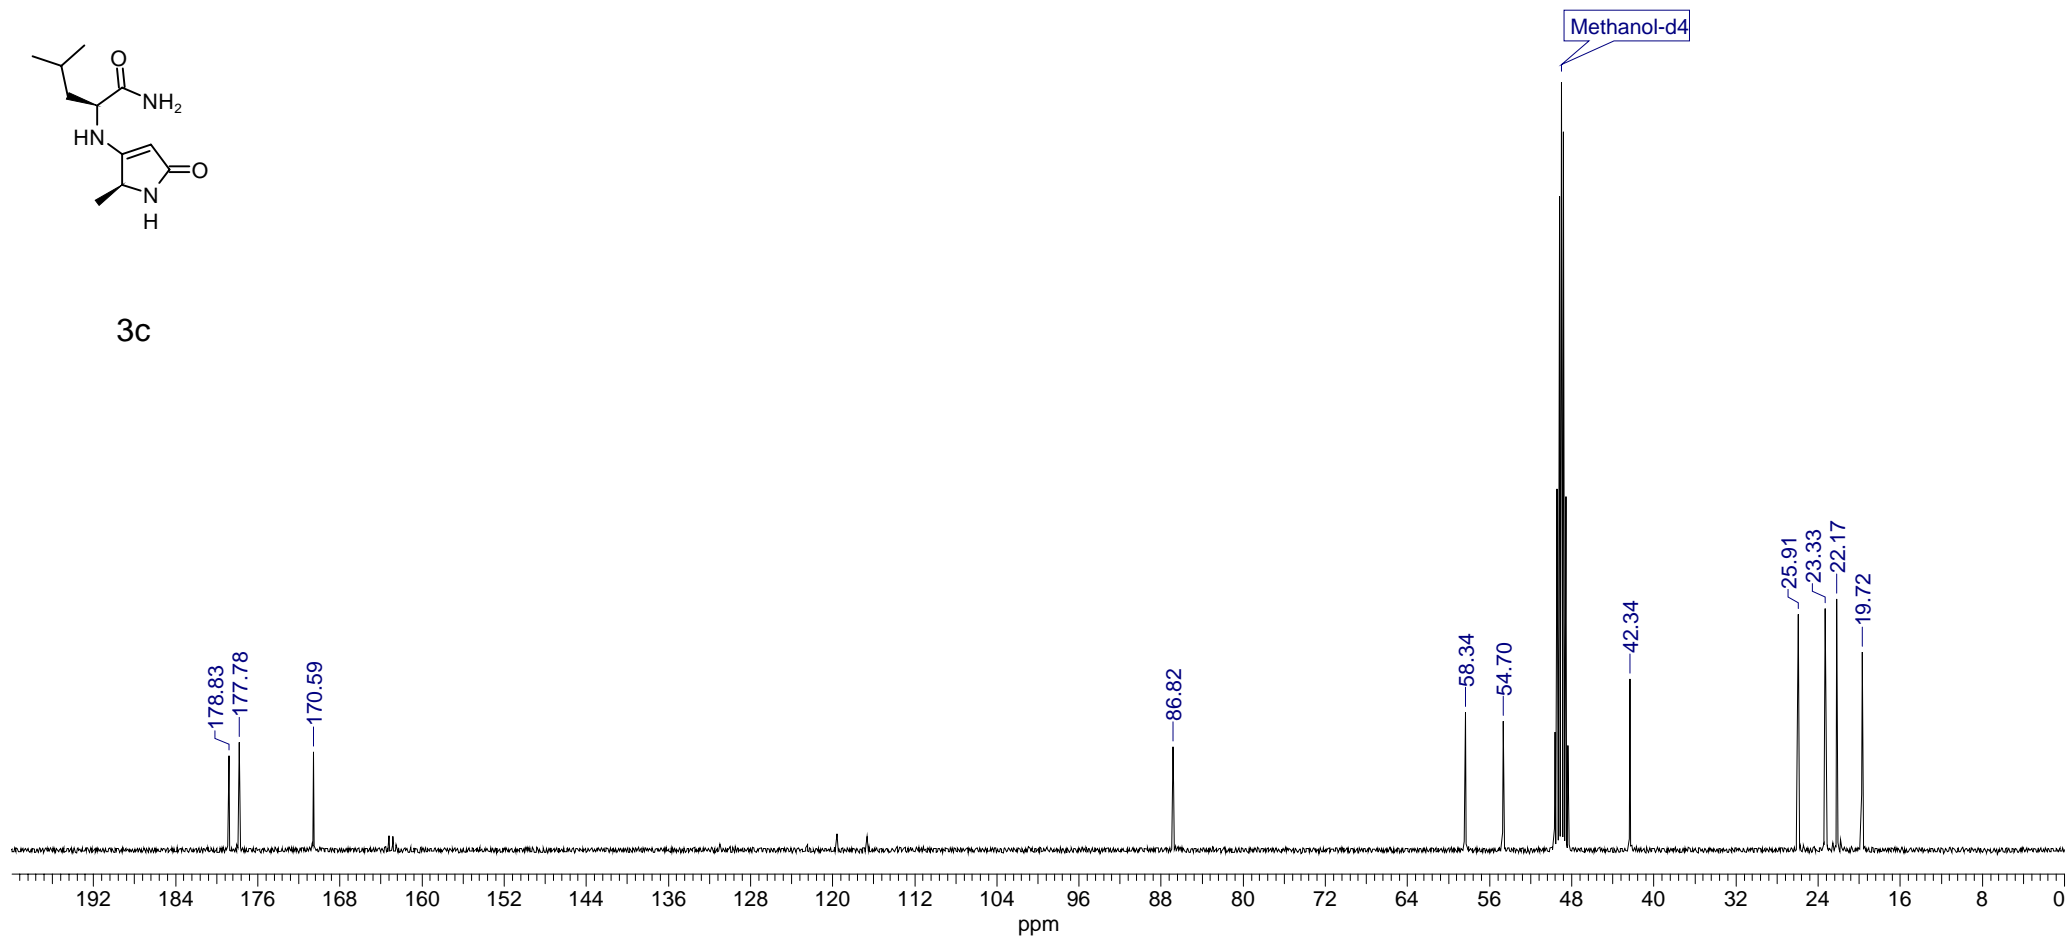

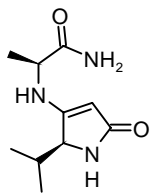

3d

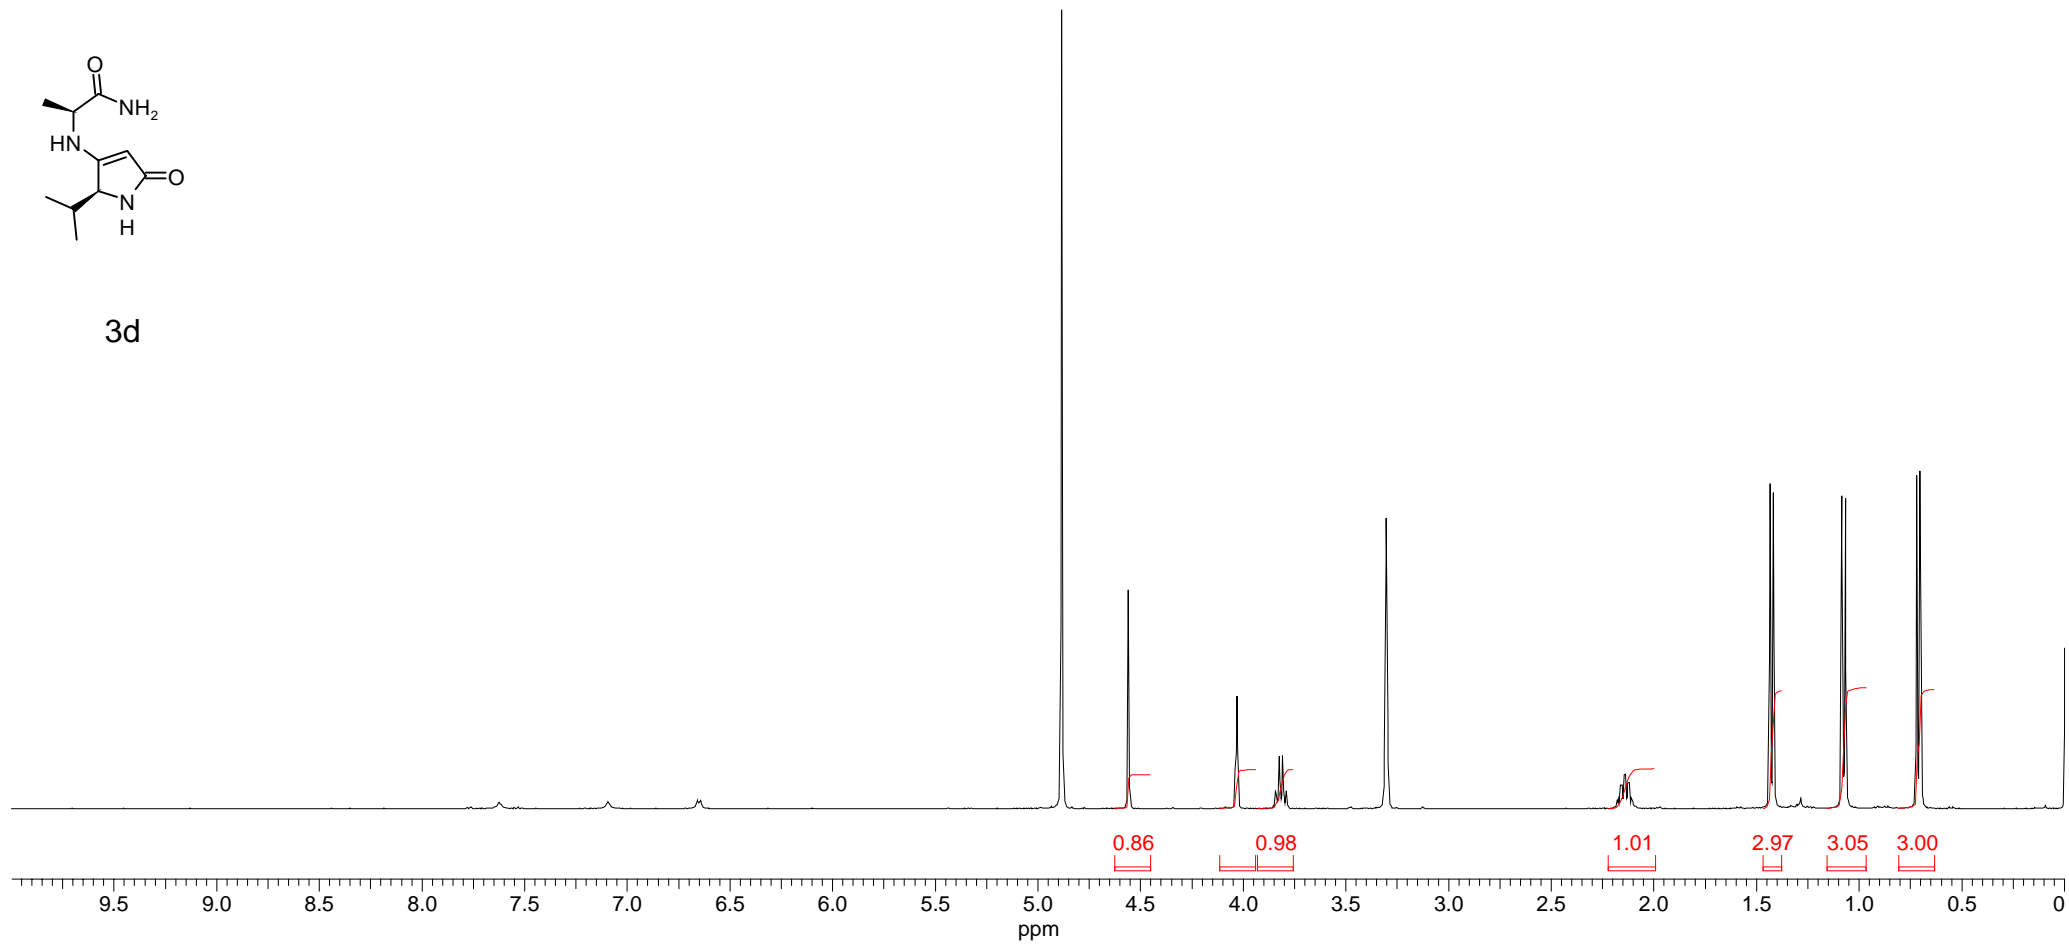



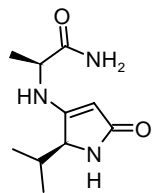

3d

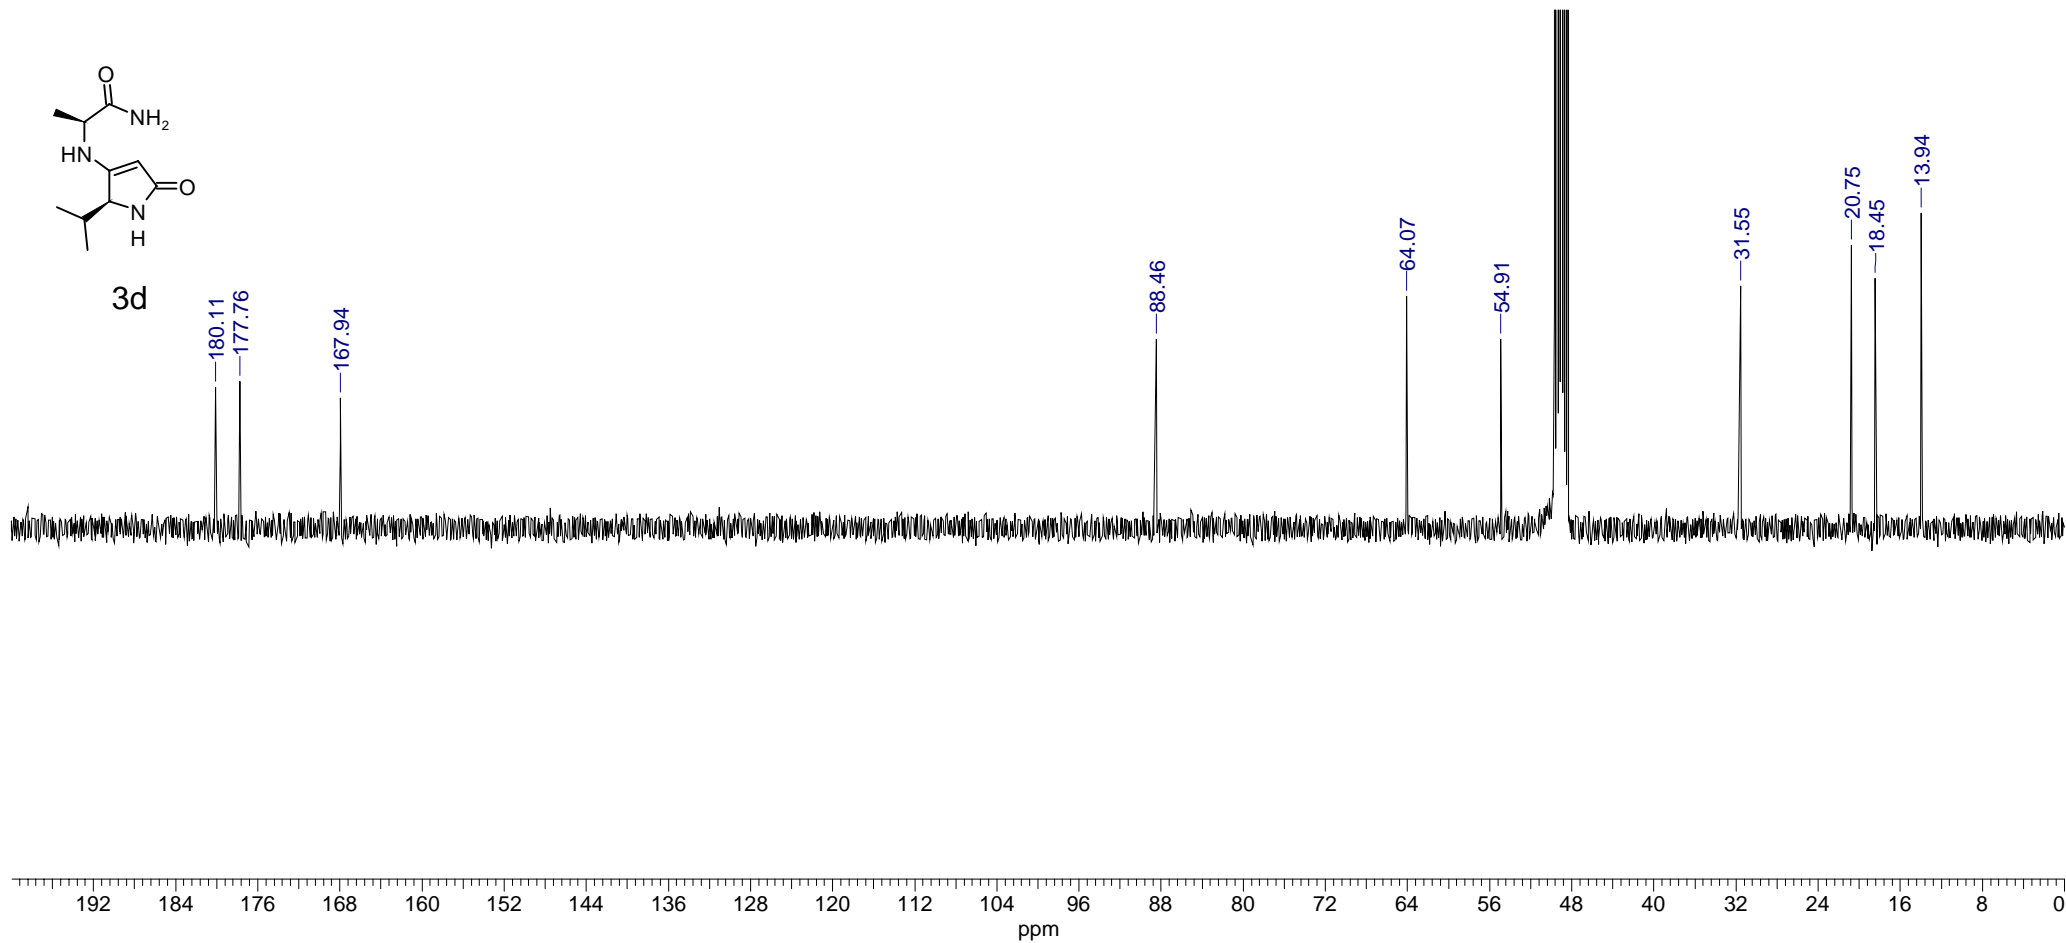

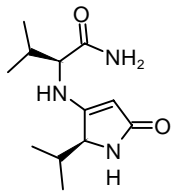

3e

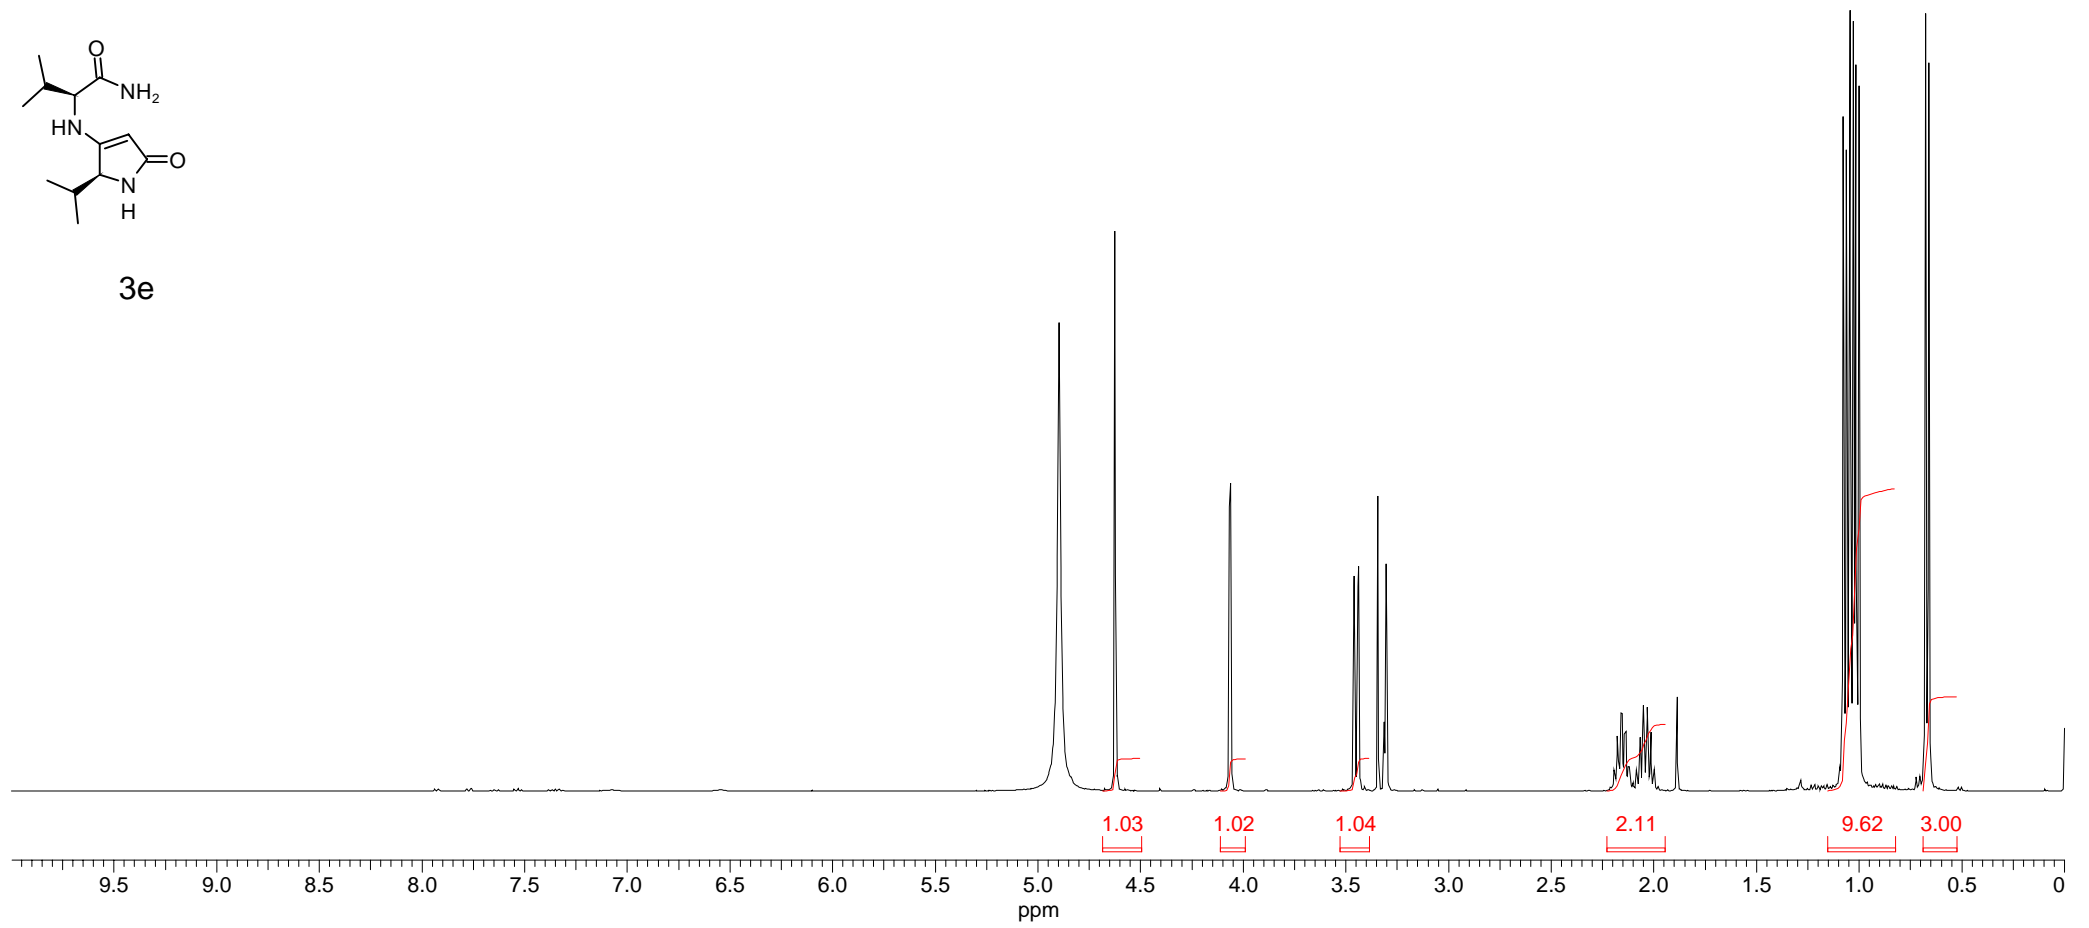

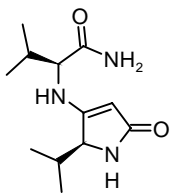

3e

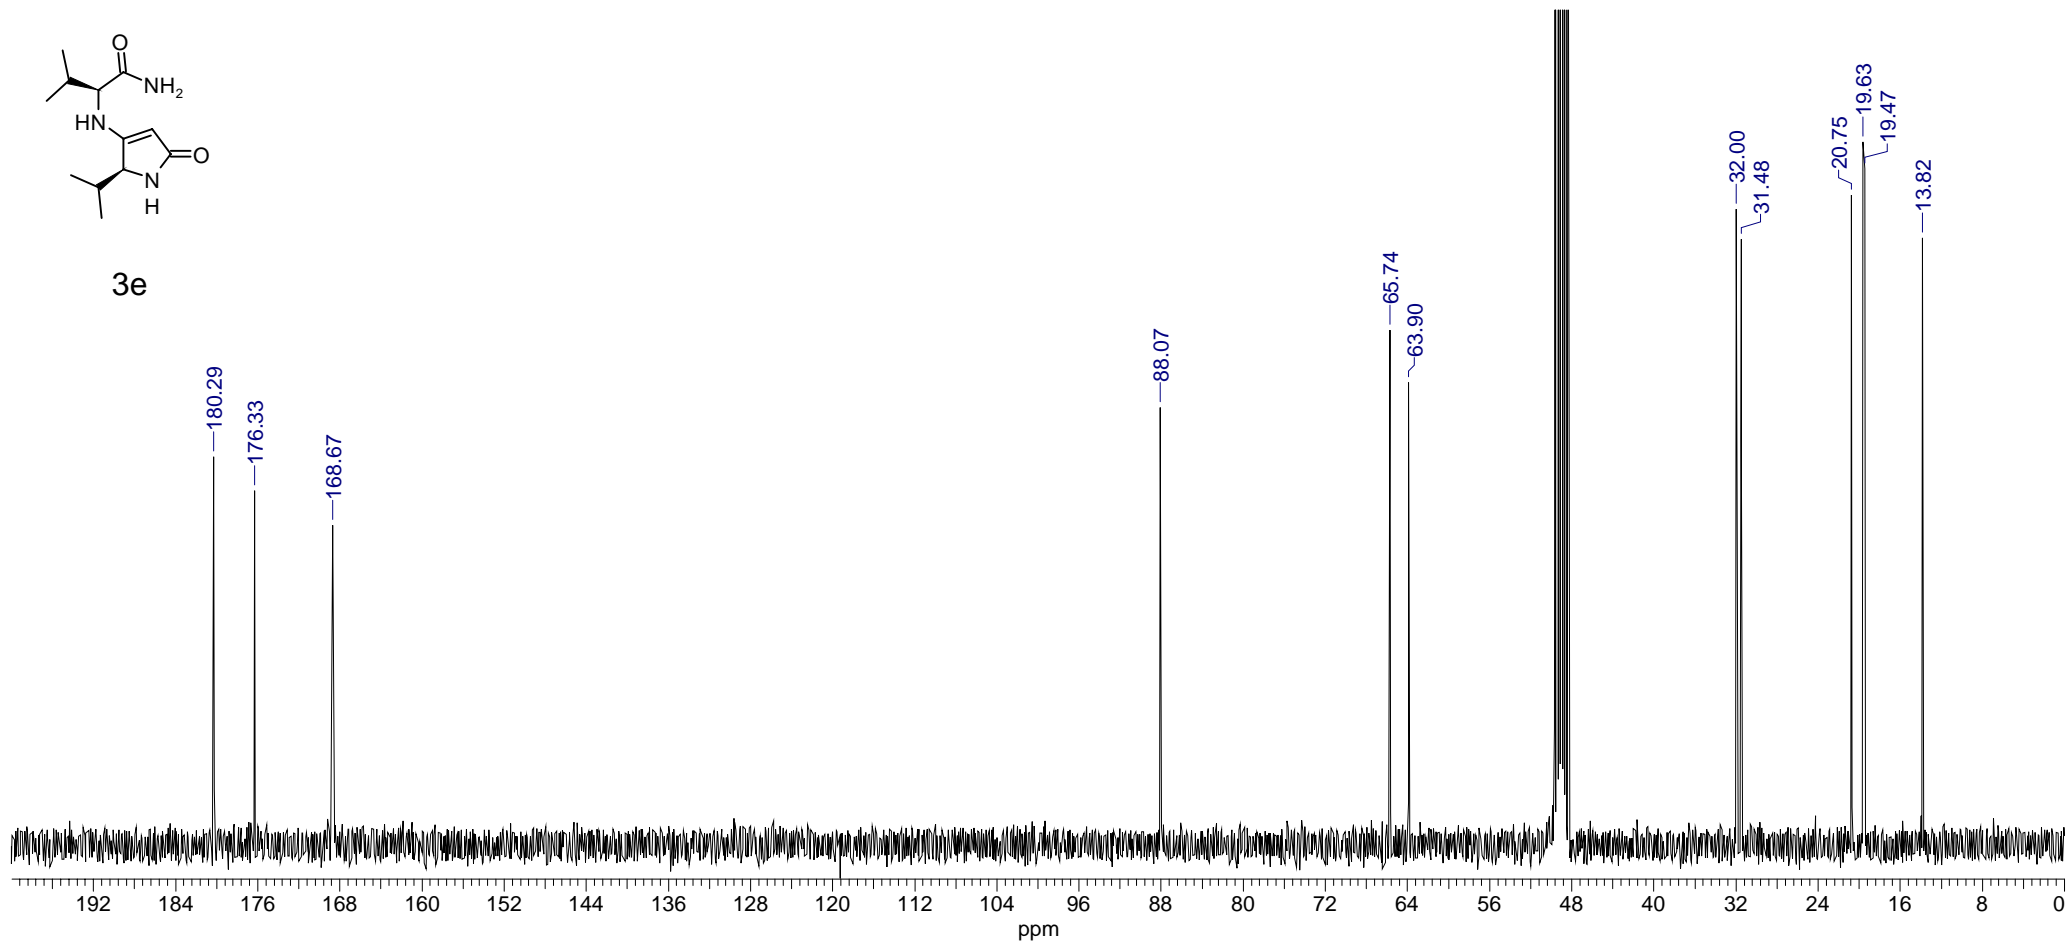

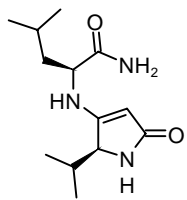

3f

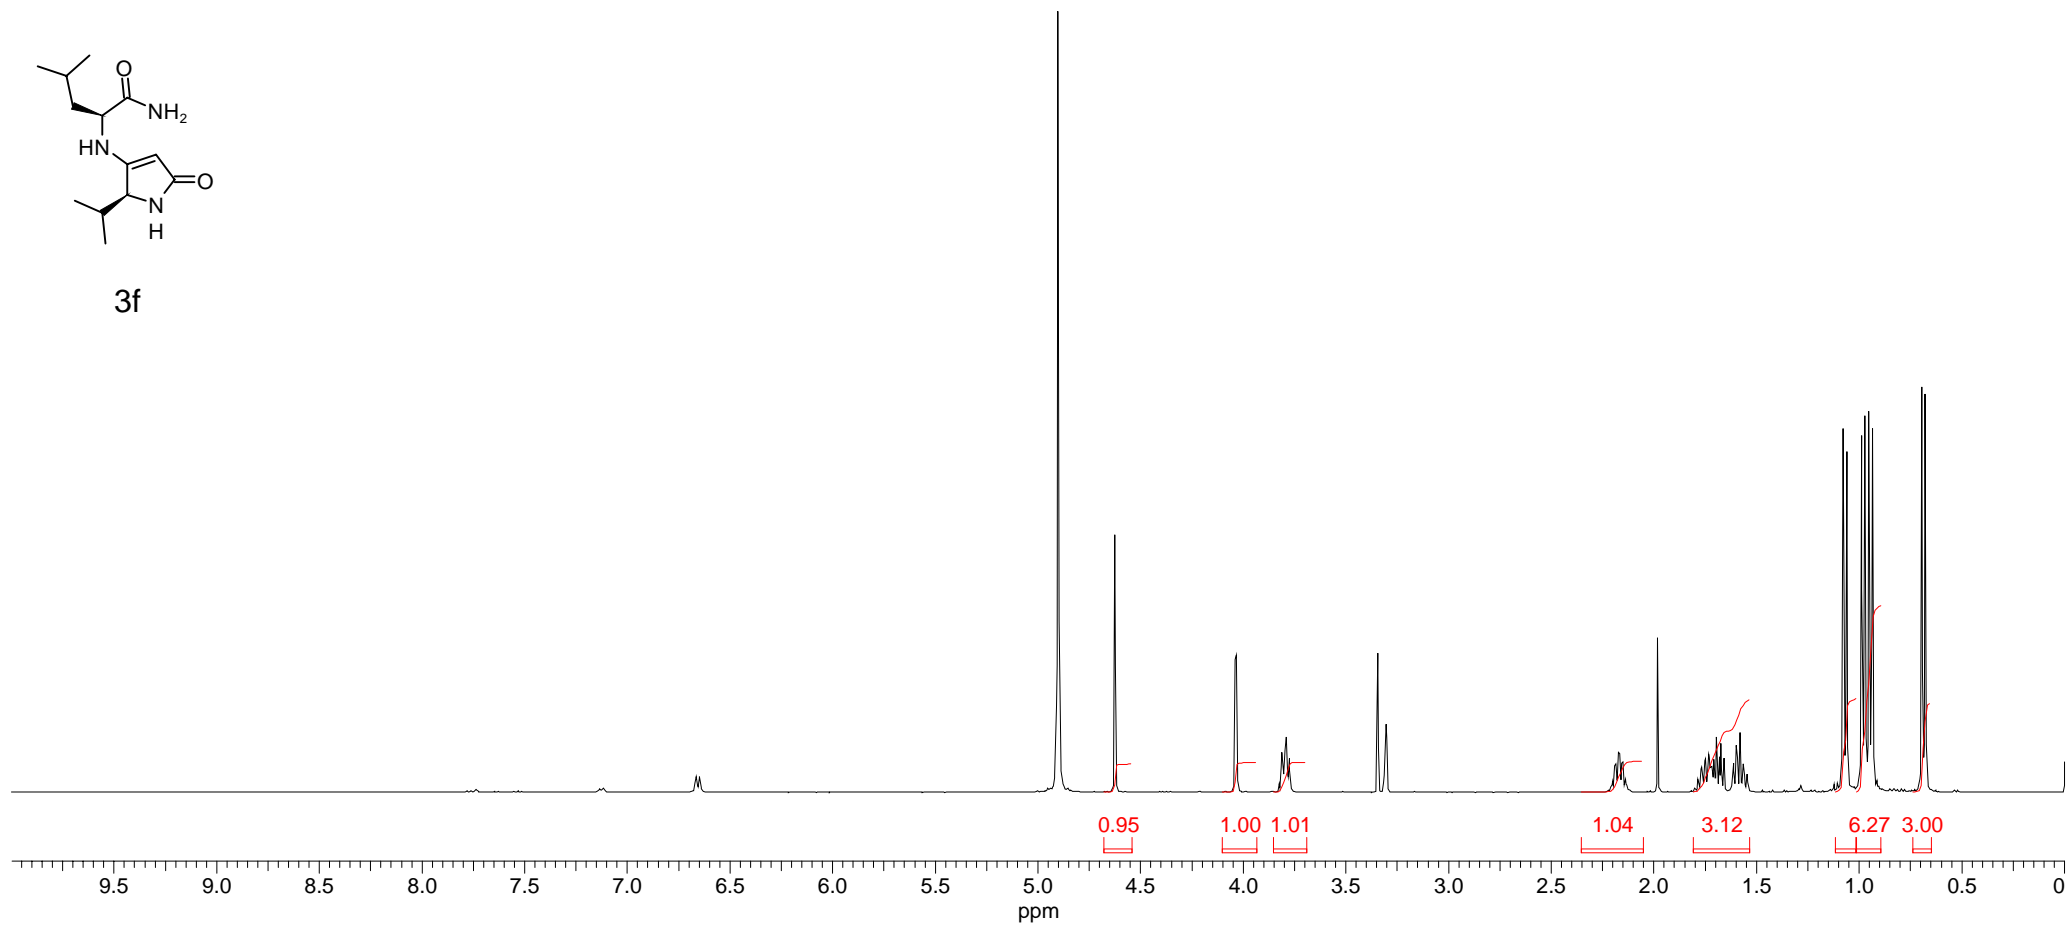

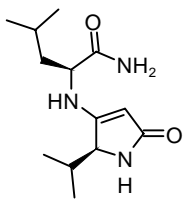

3f

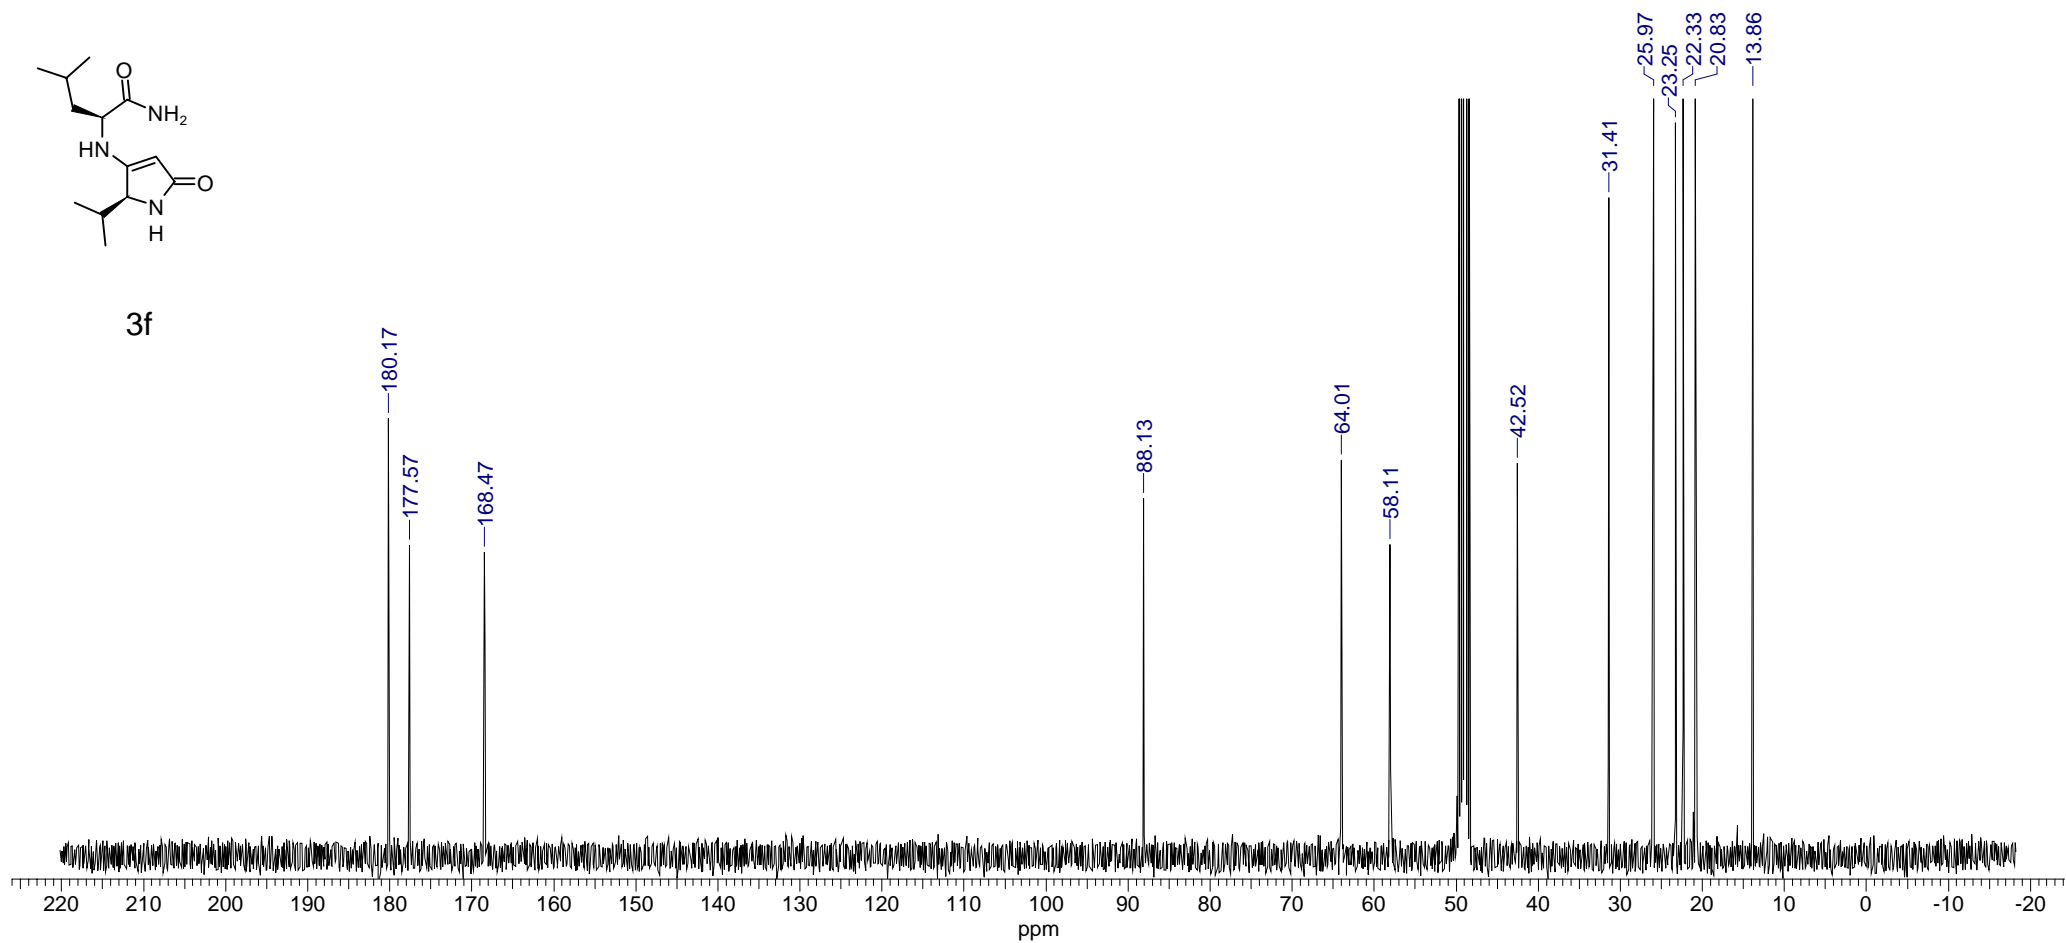

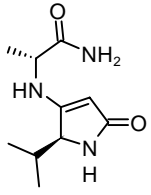

3g

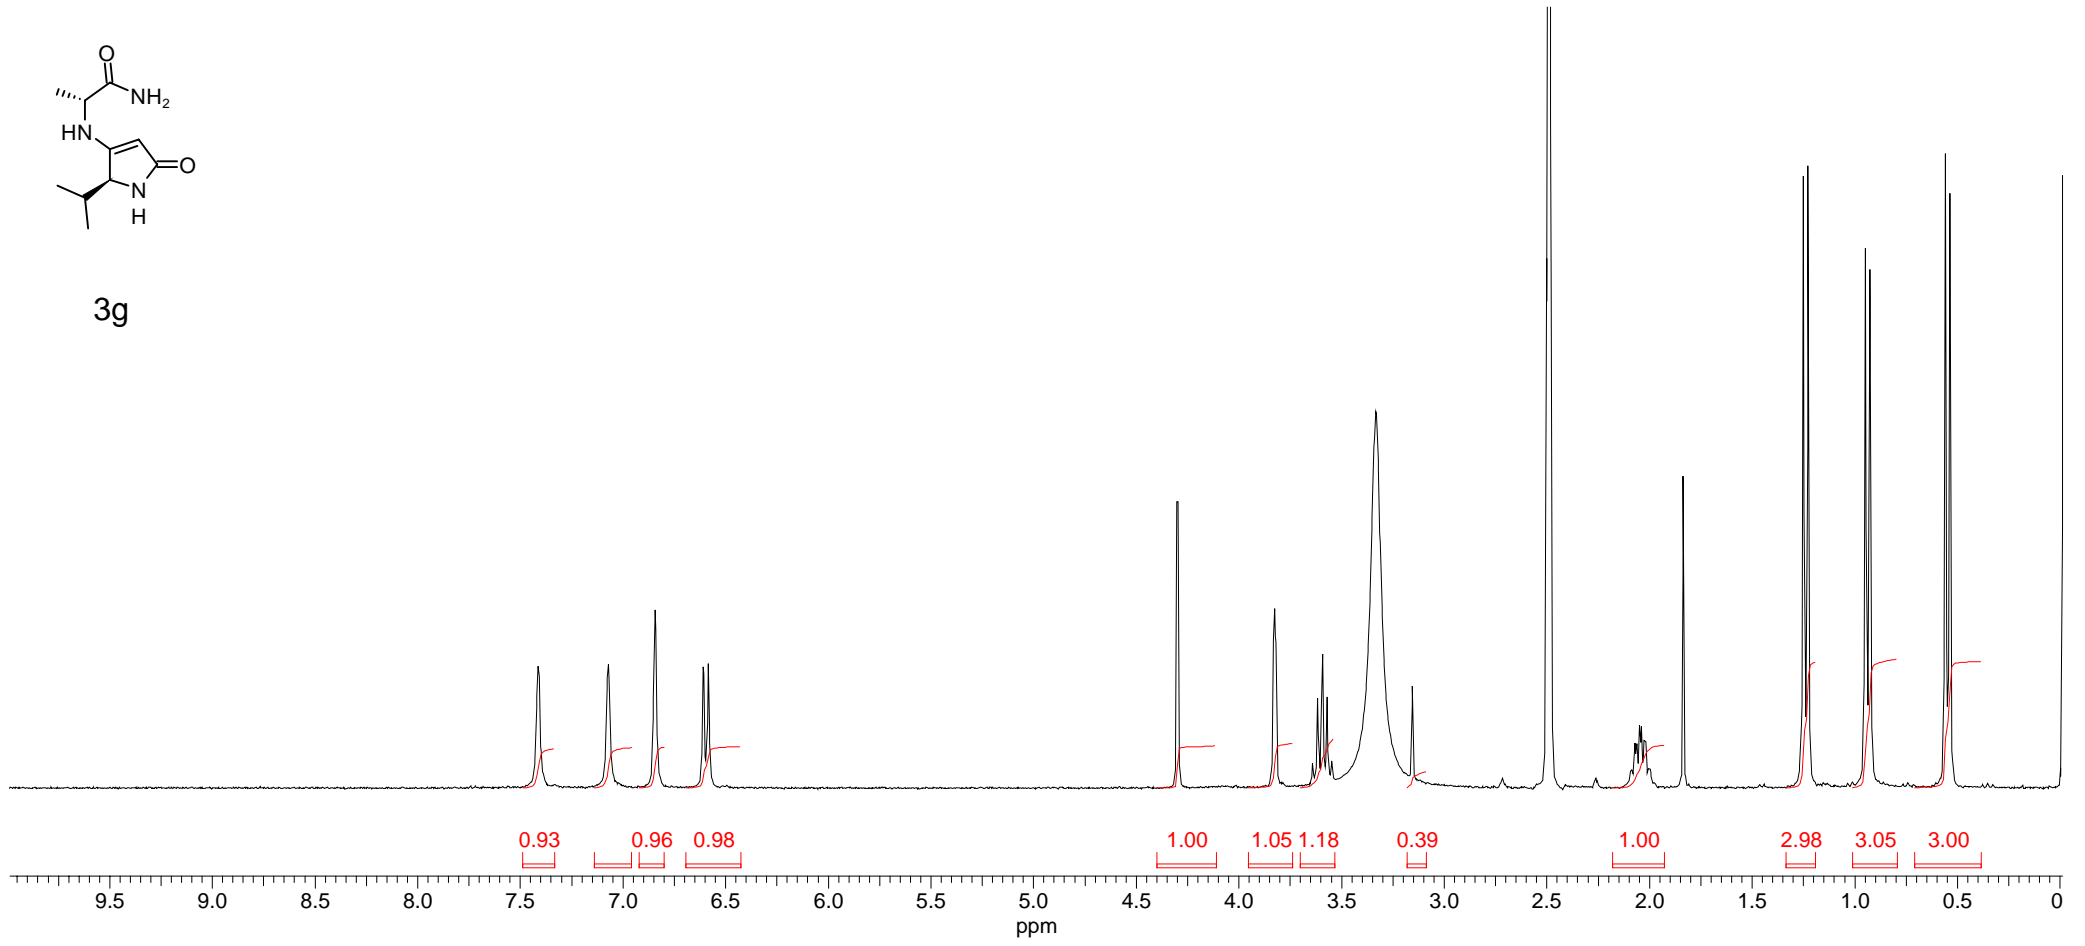

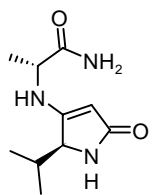

3g

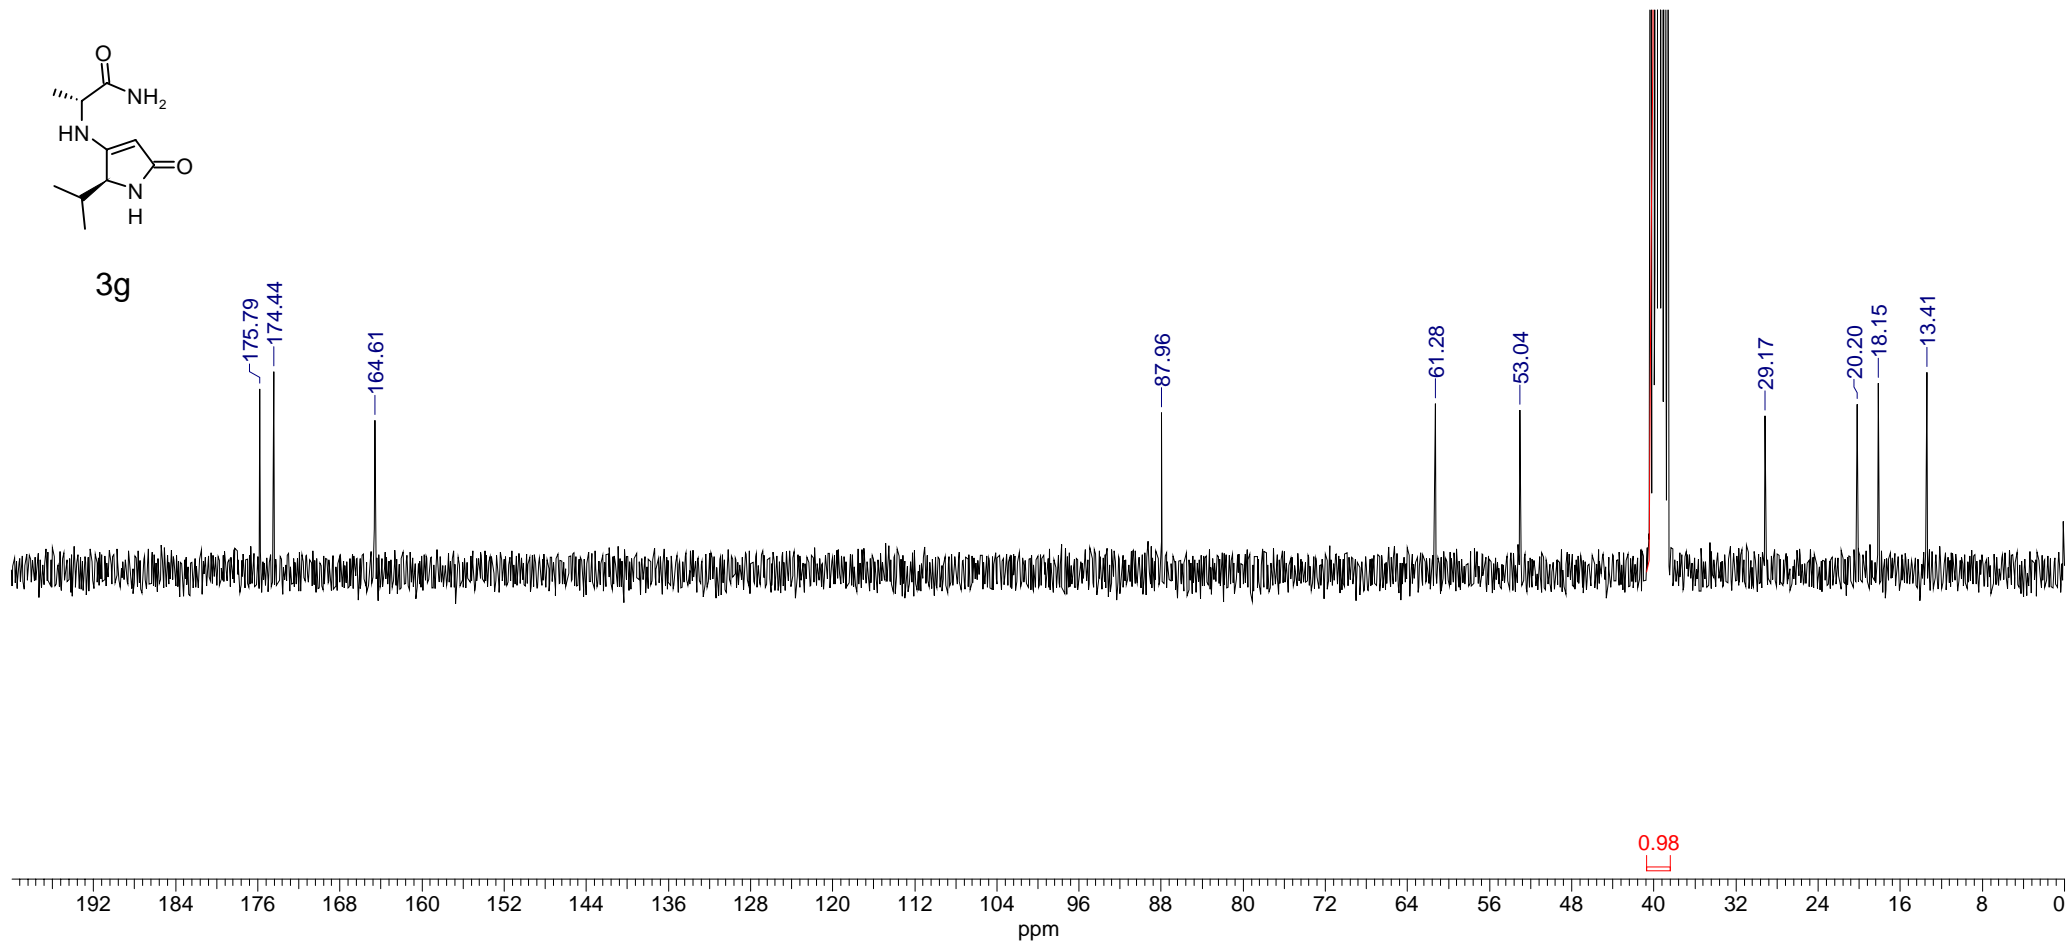

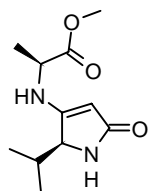

3h

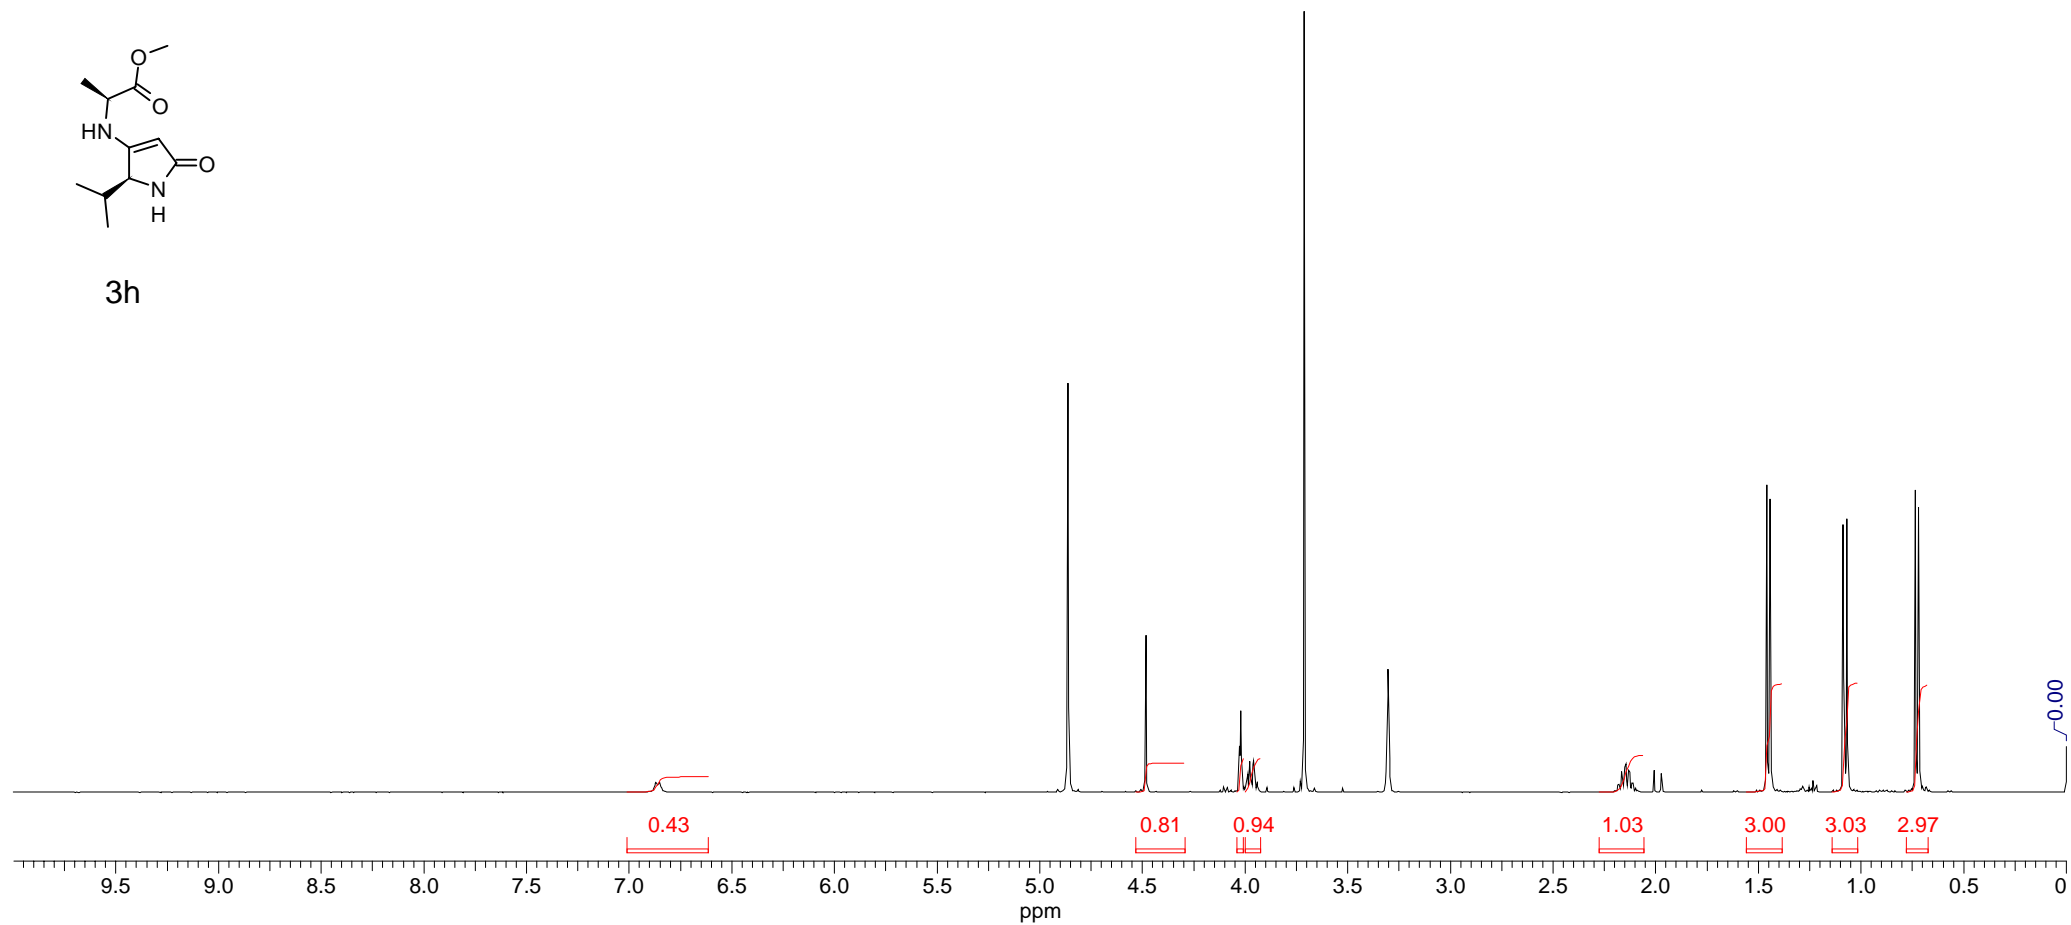



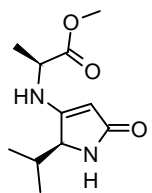

3h

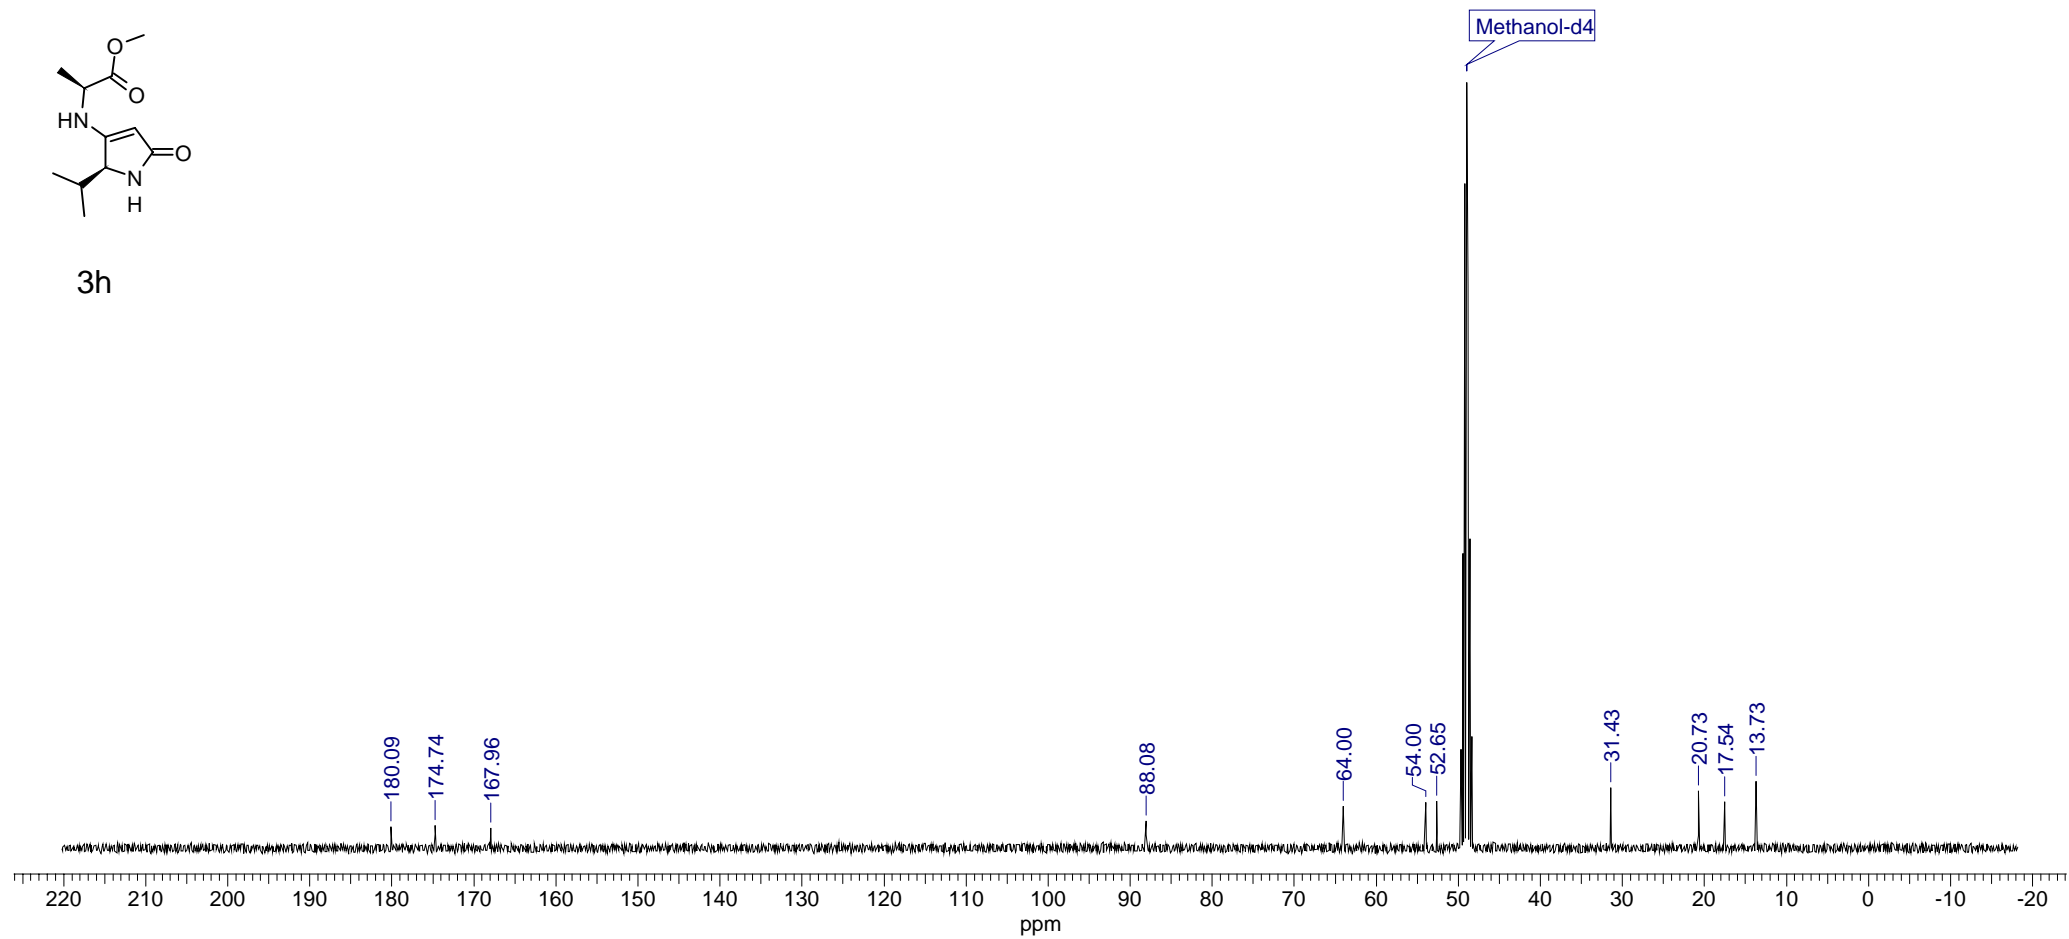

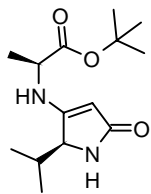

3i

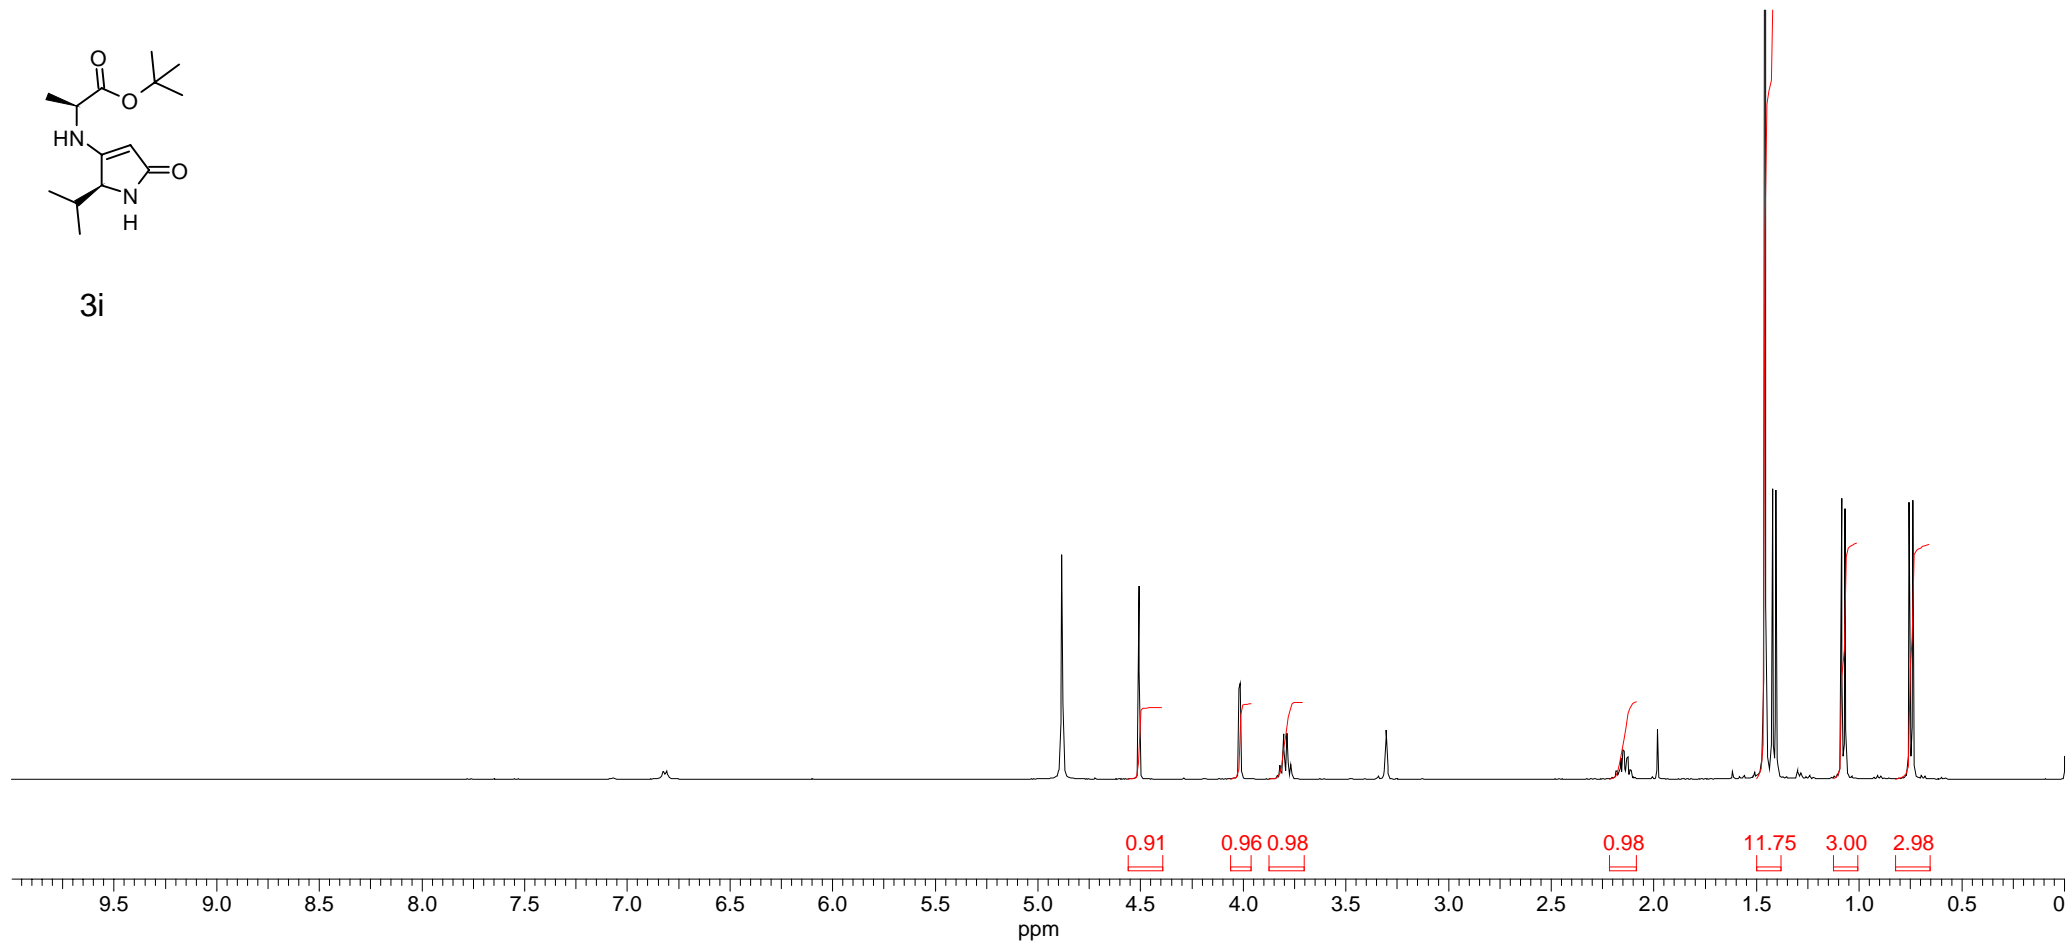

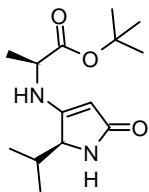

3i

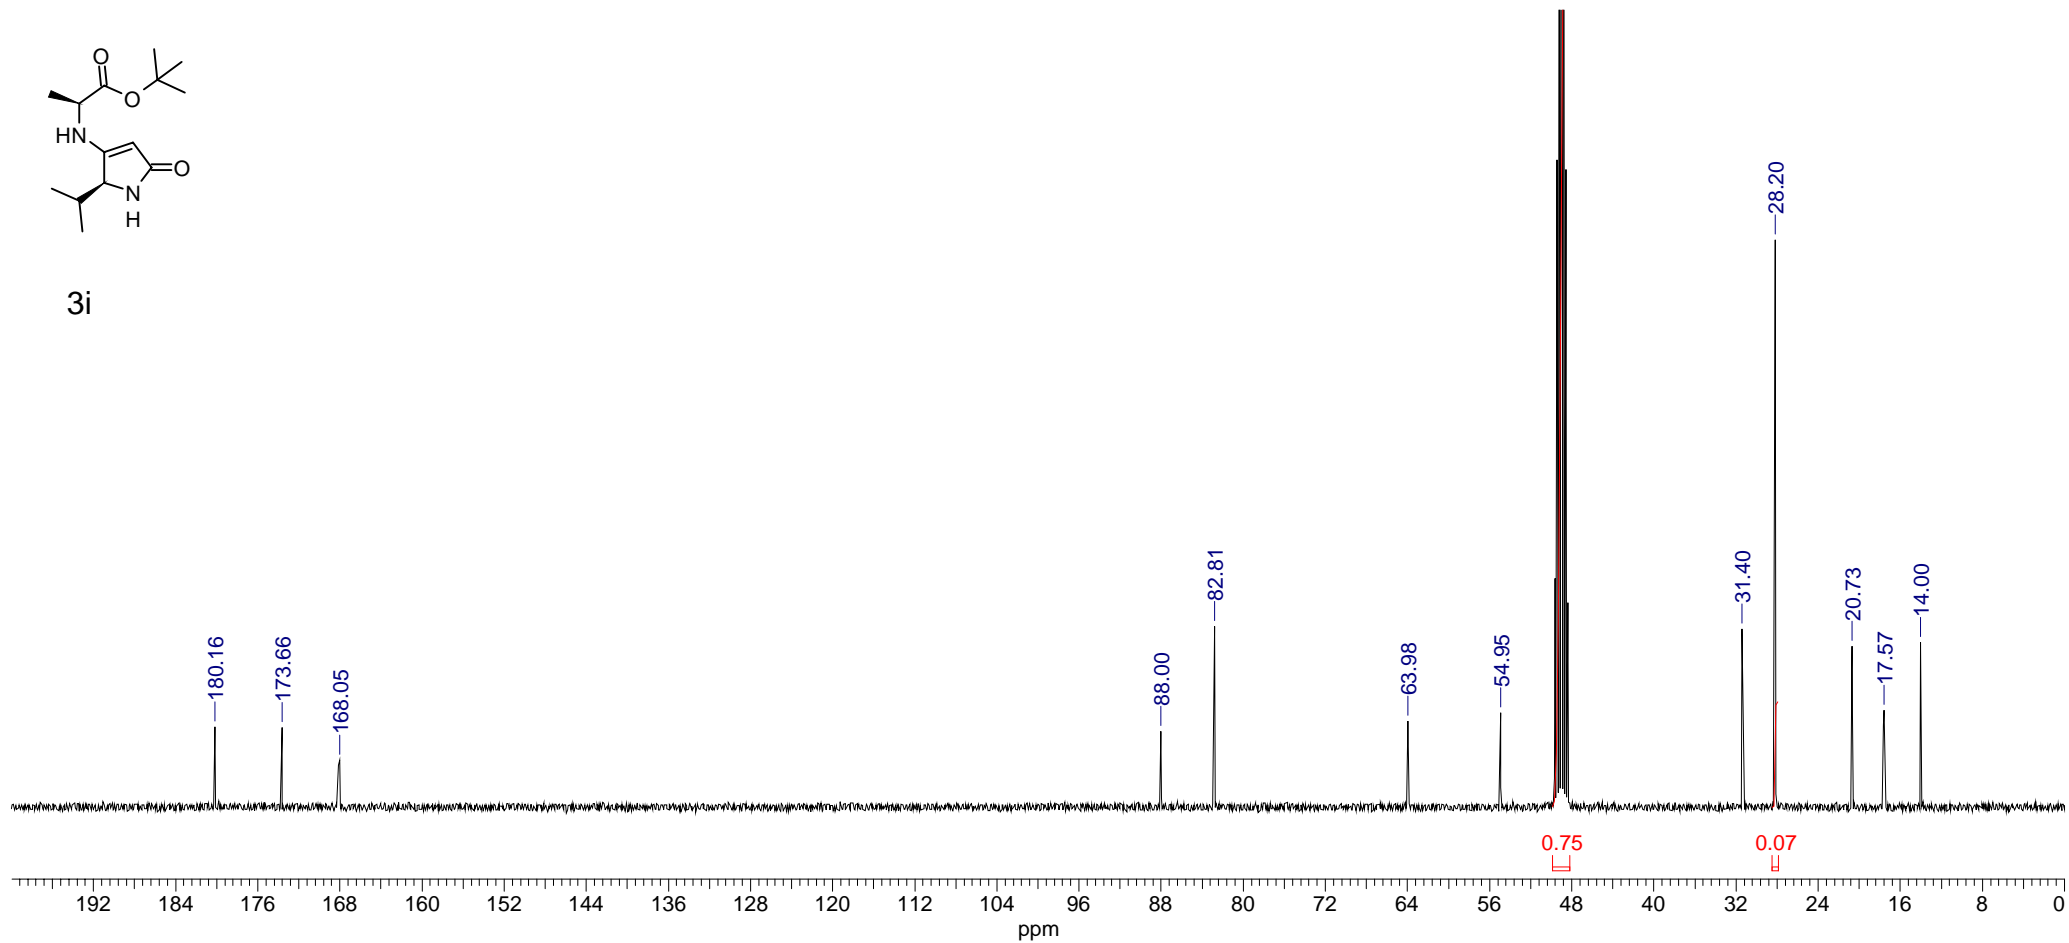

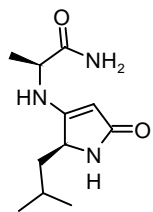

3k

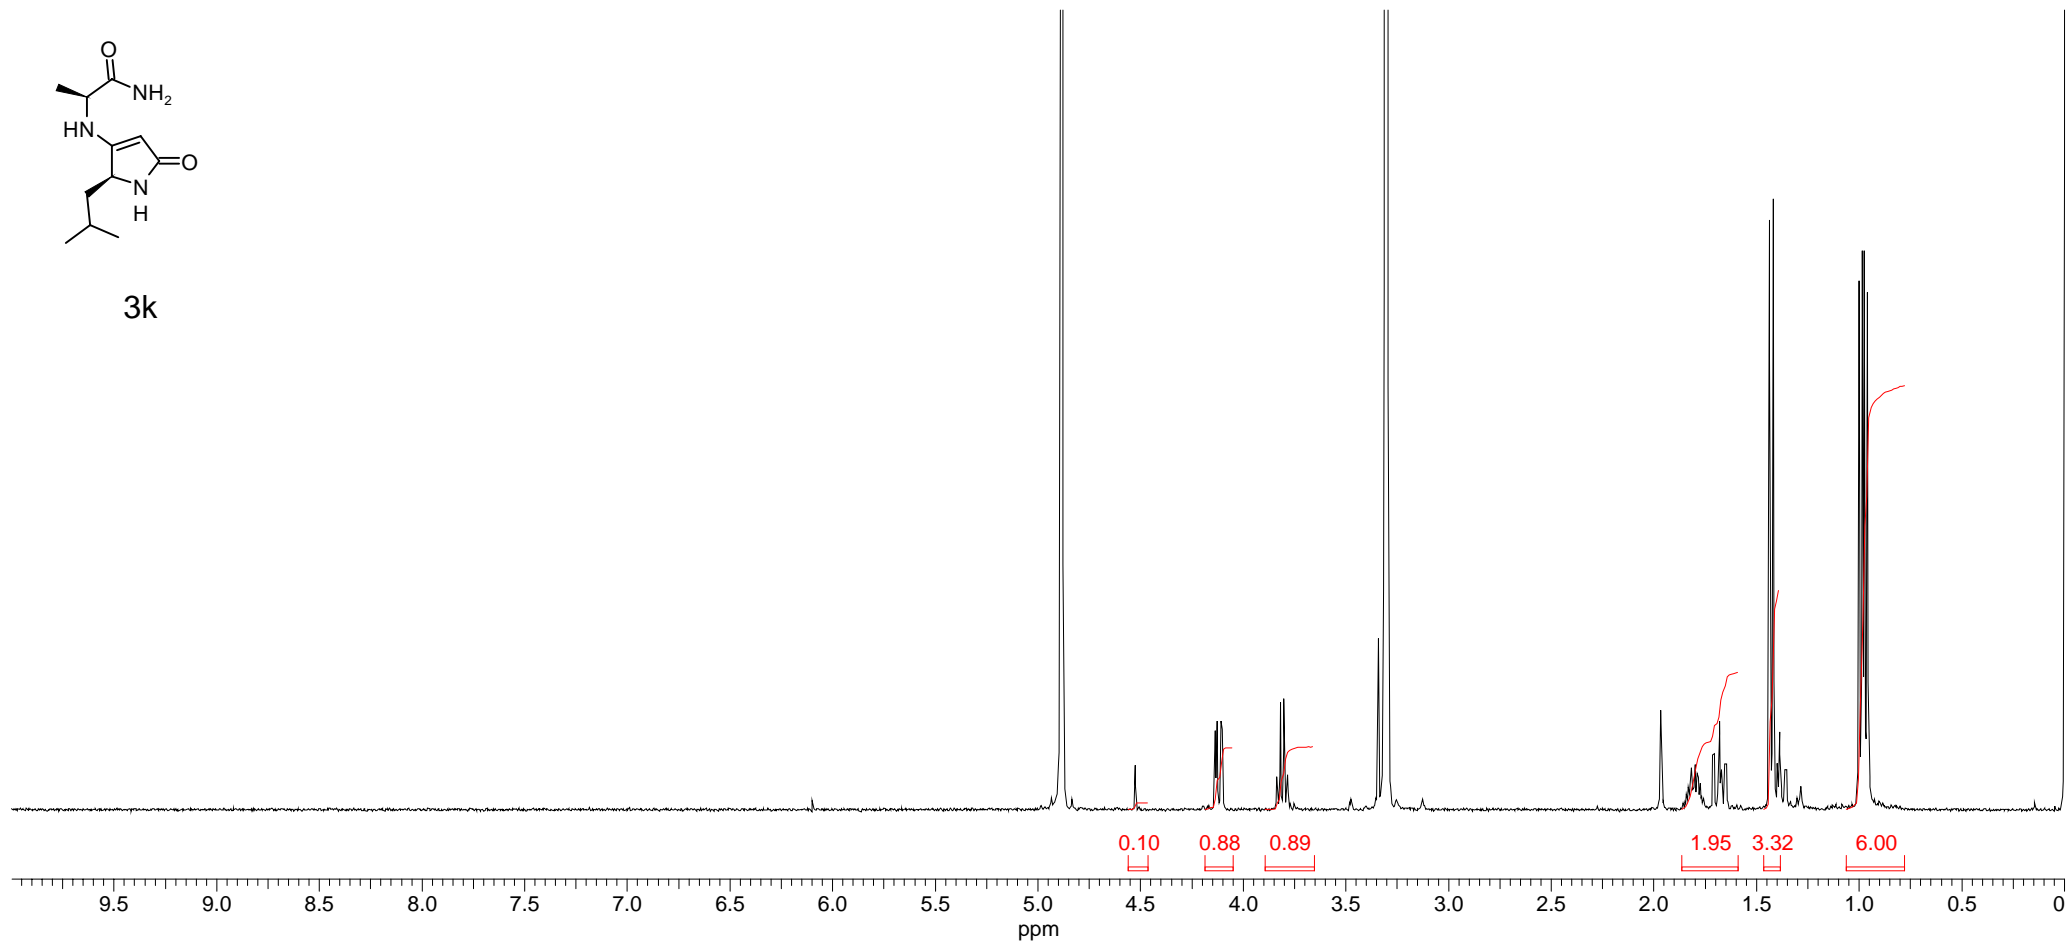

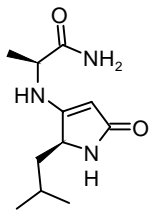

3k

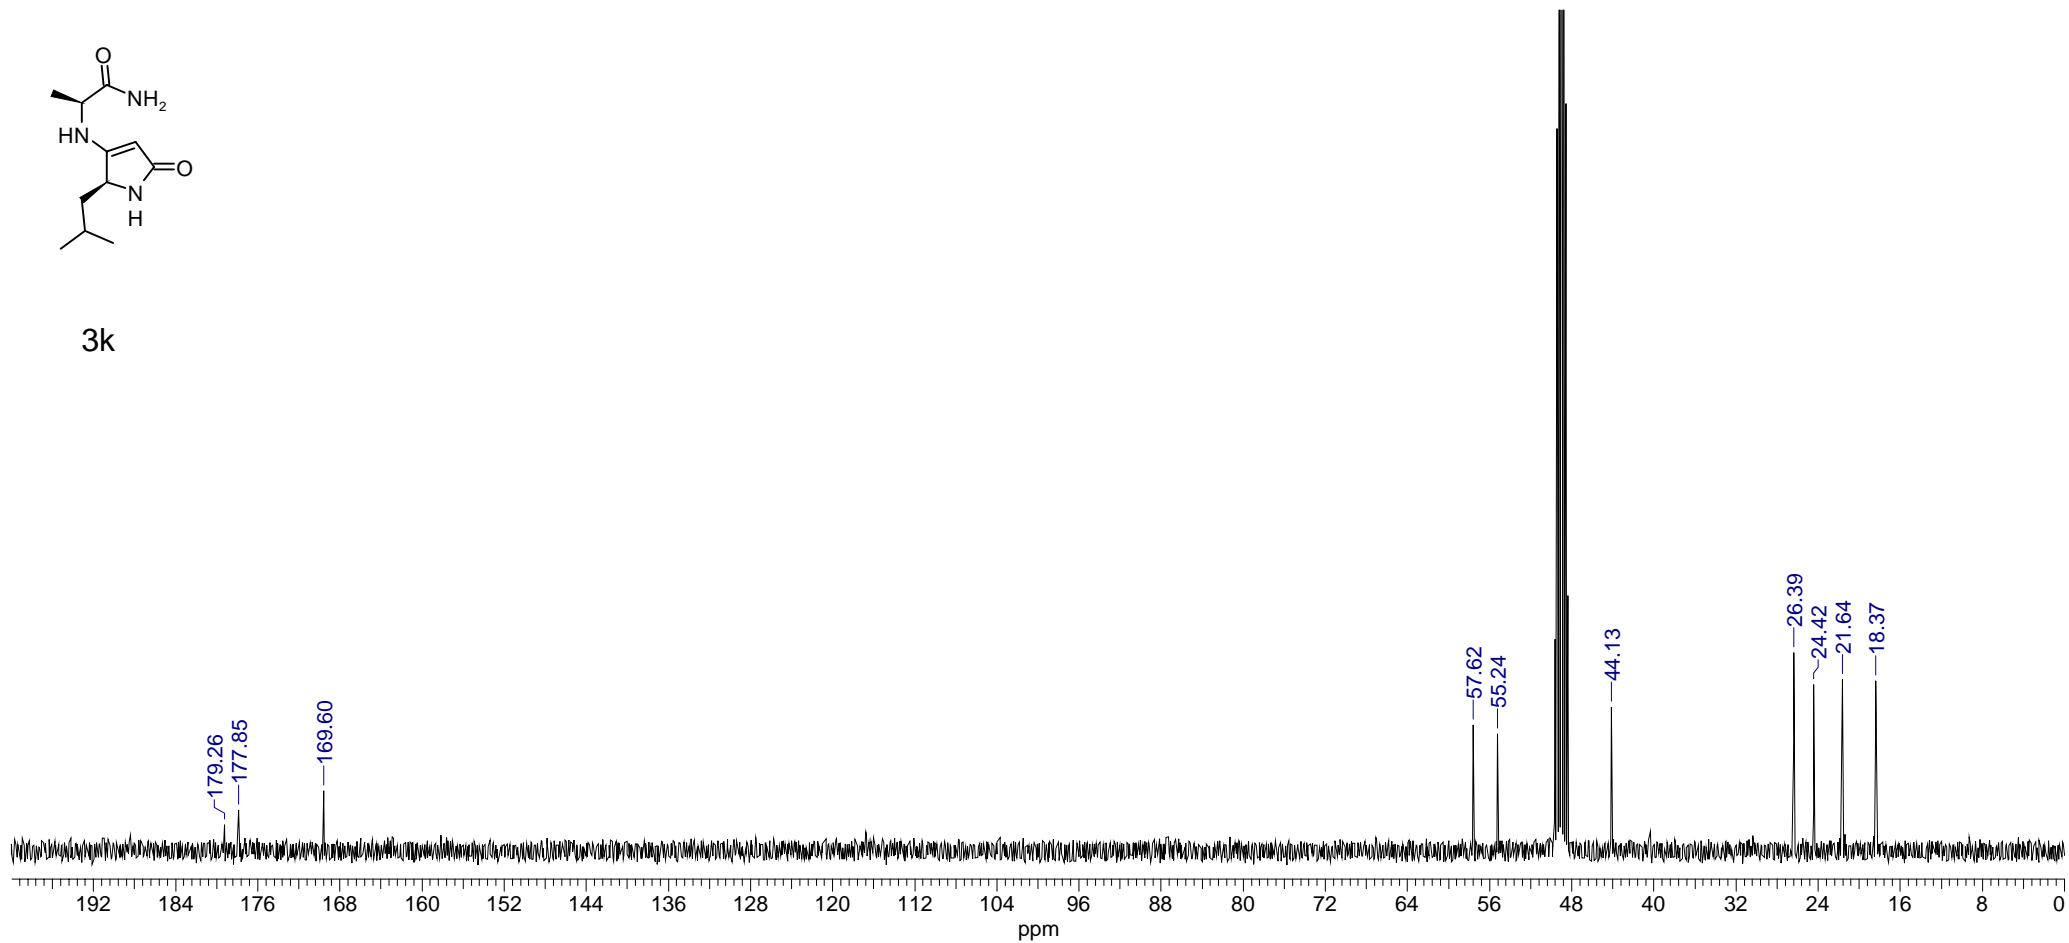

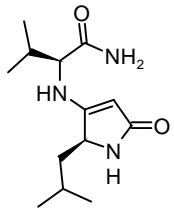

3l

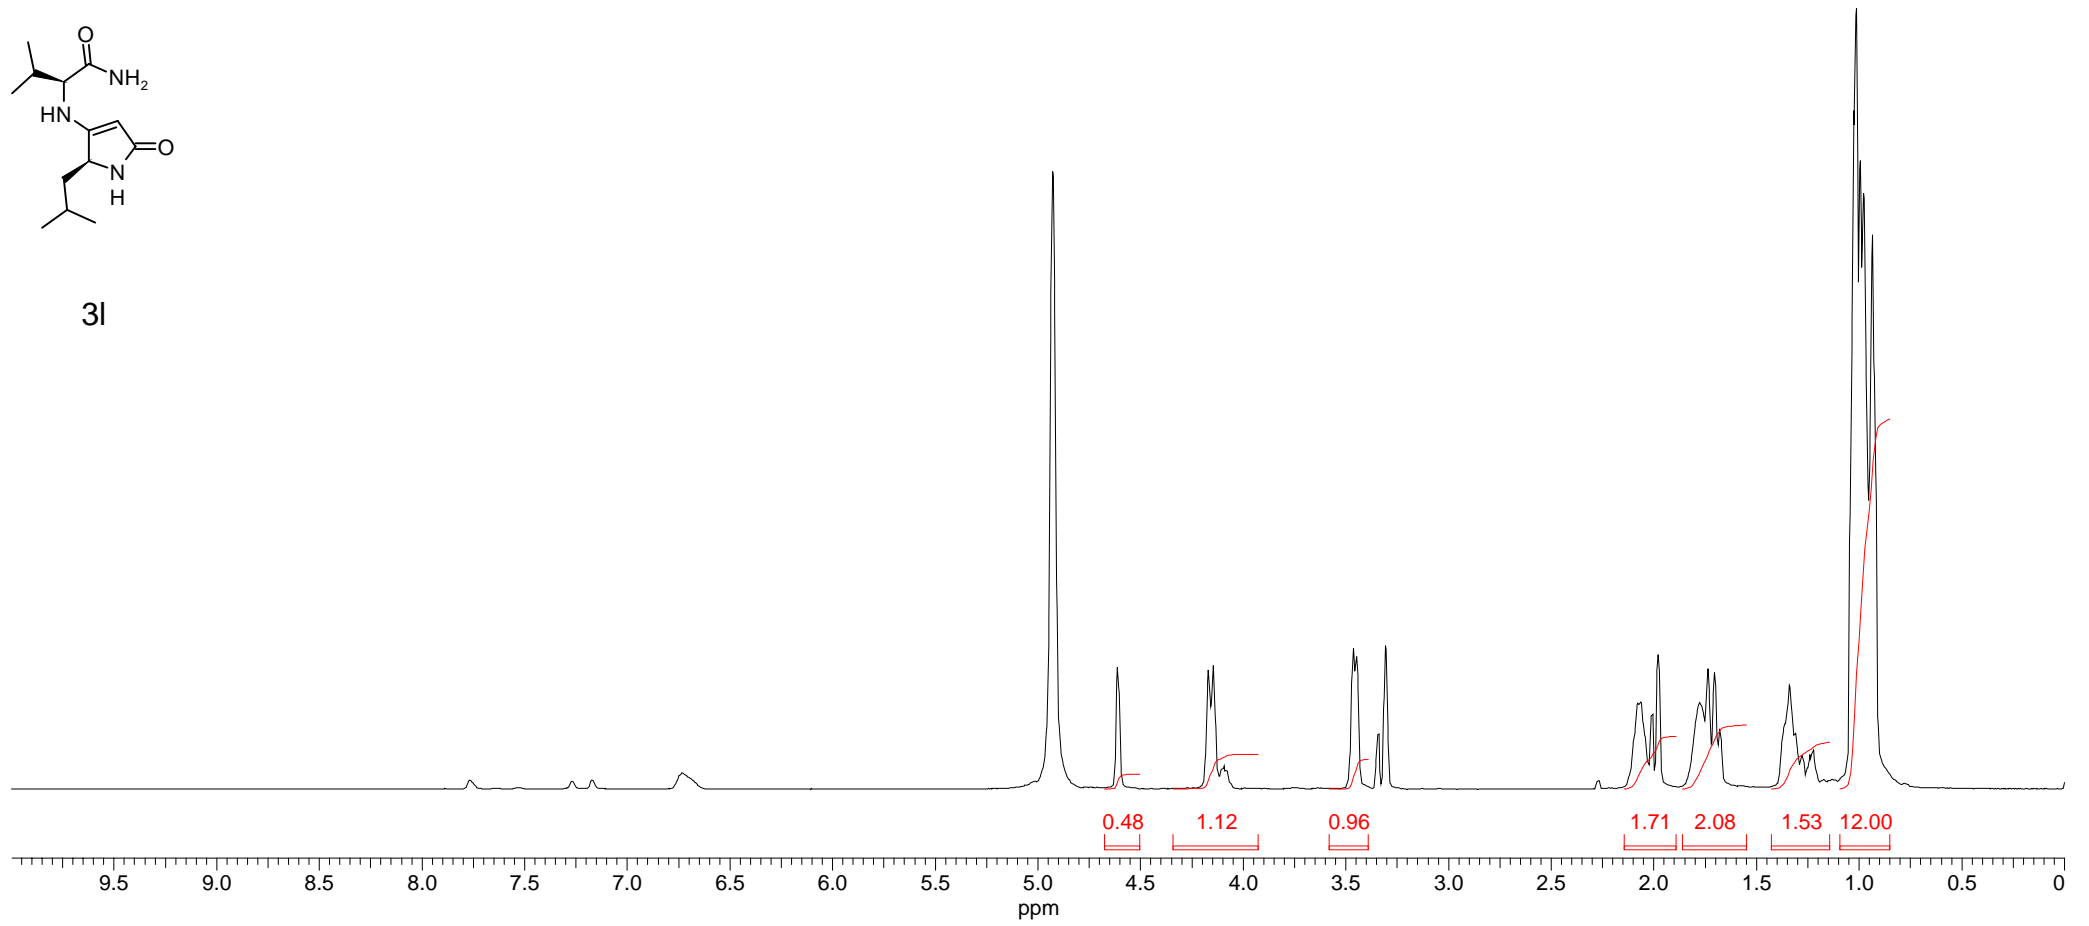

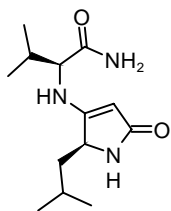

3l

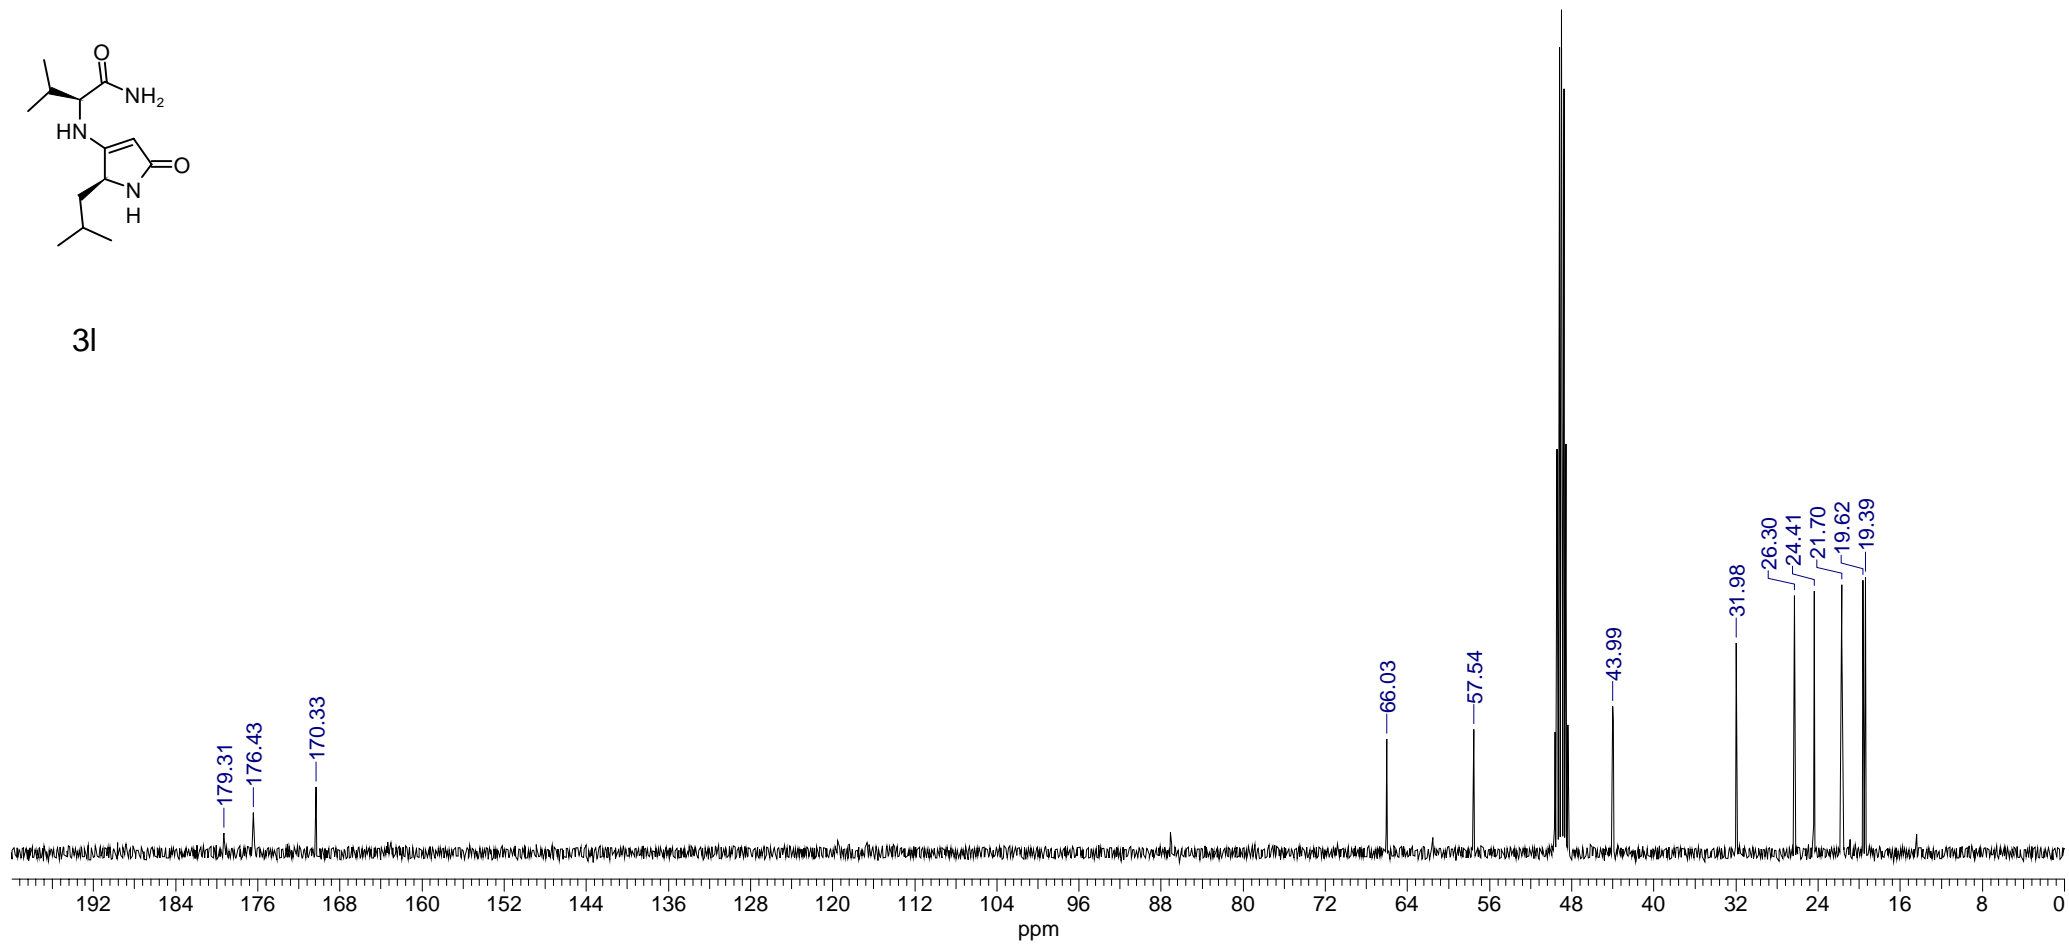

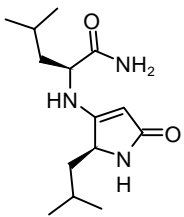

3m

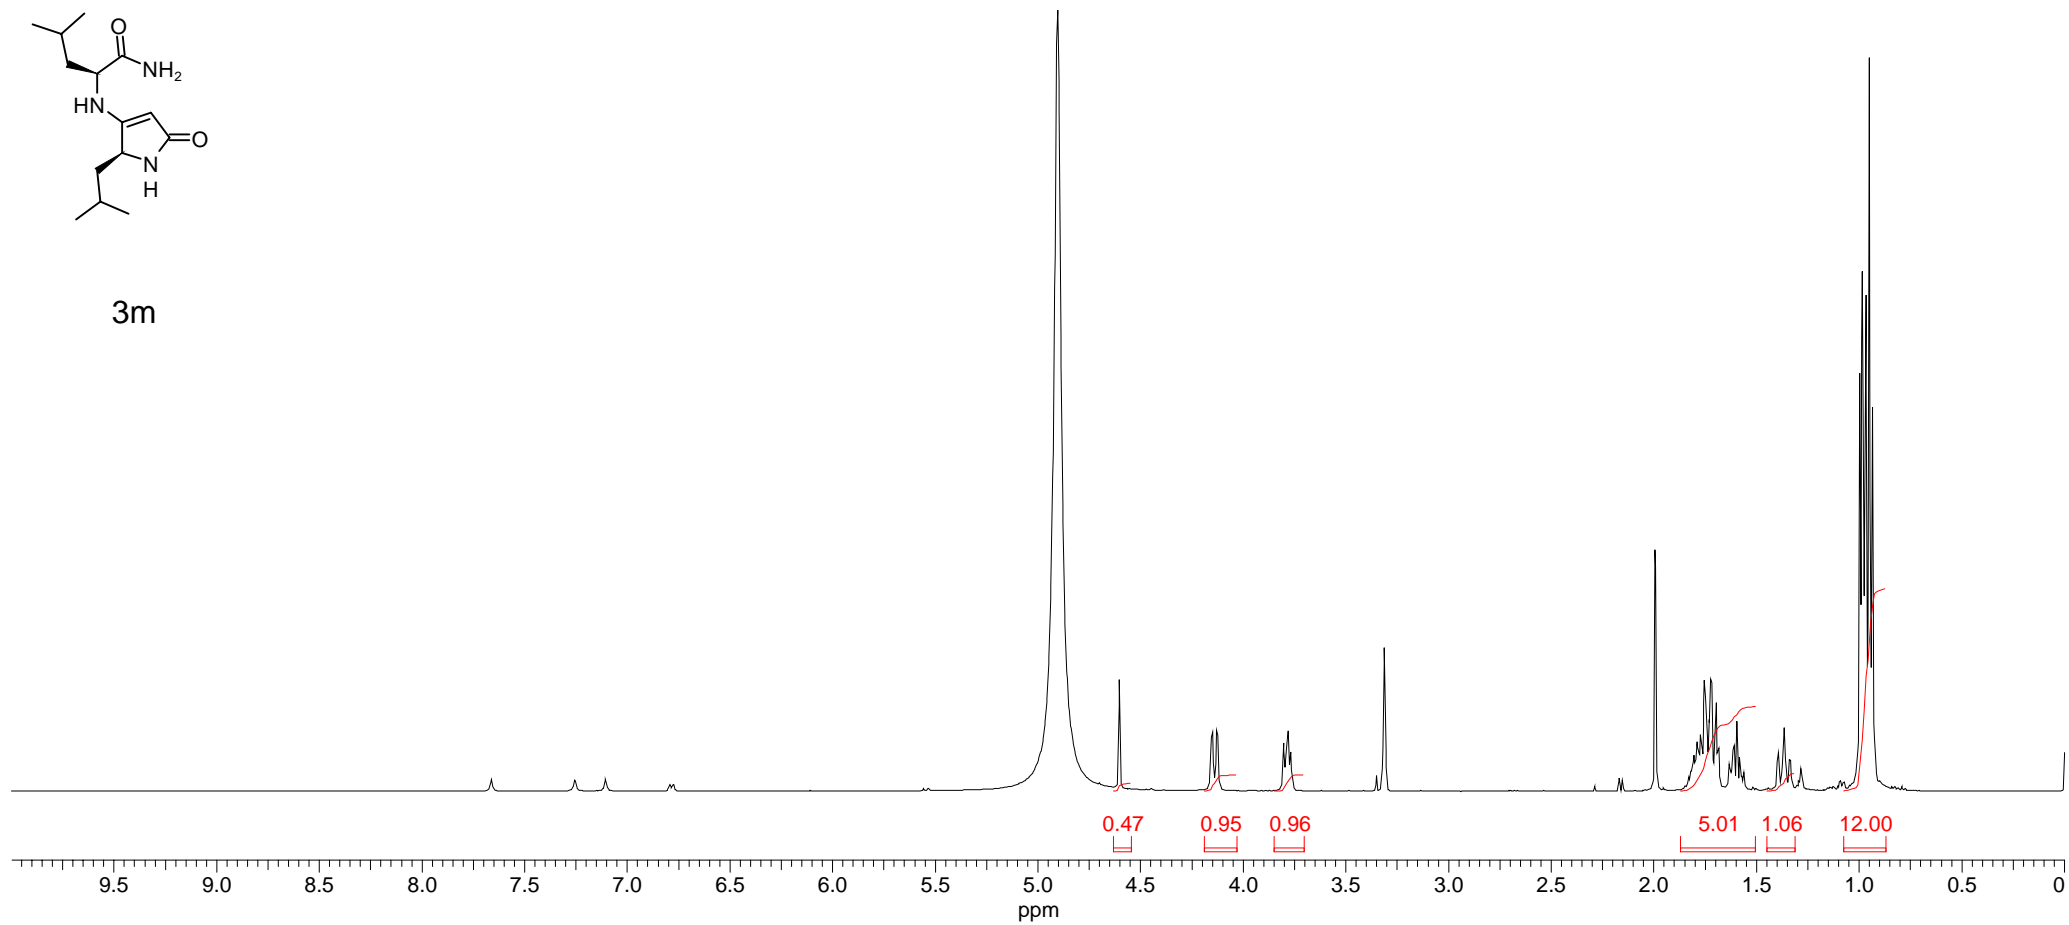



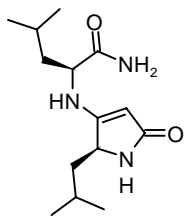

3m

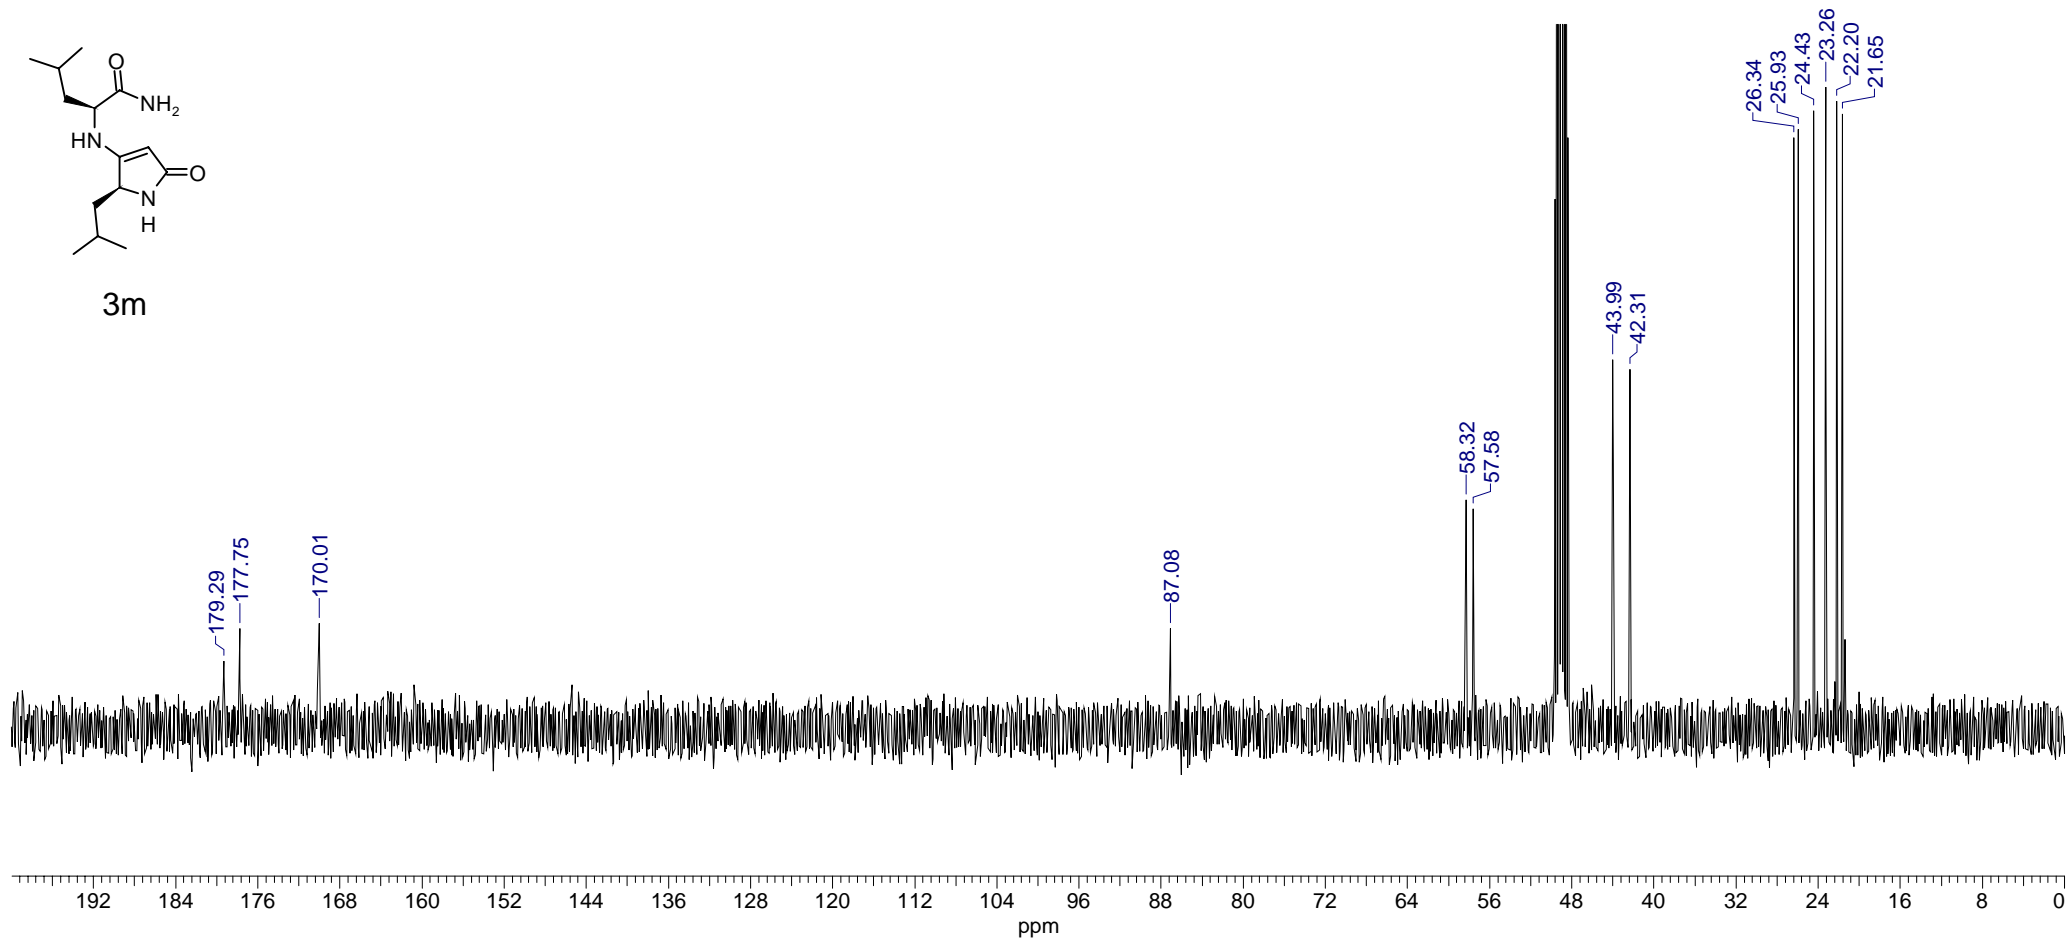

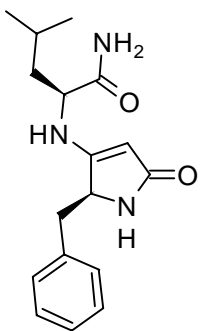

3n

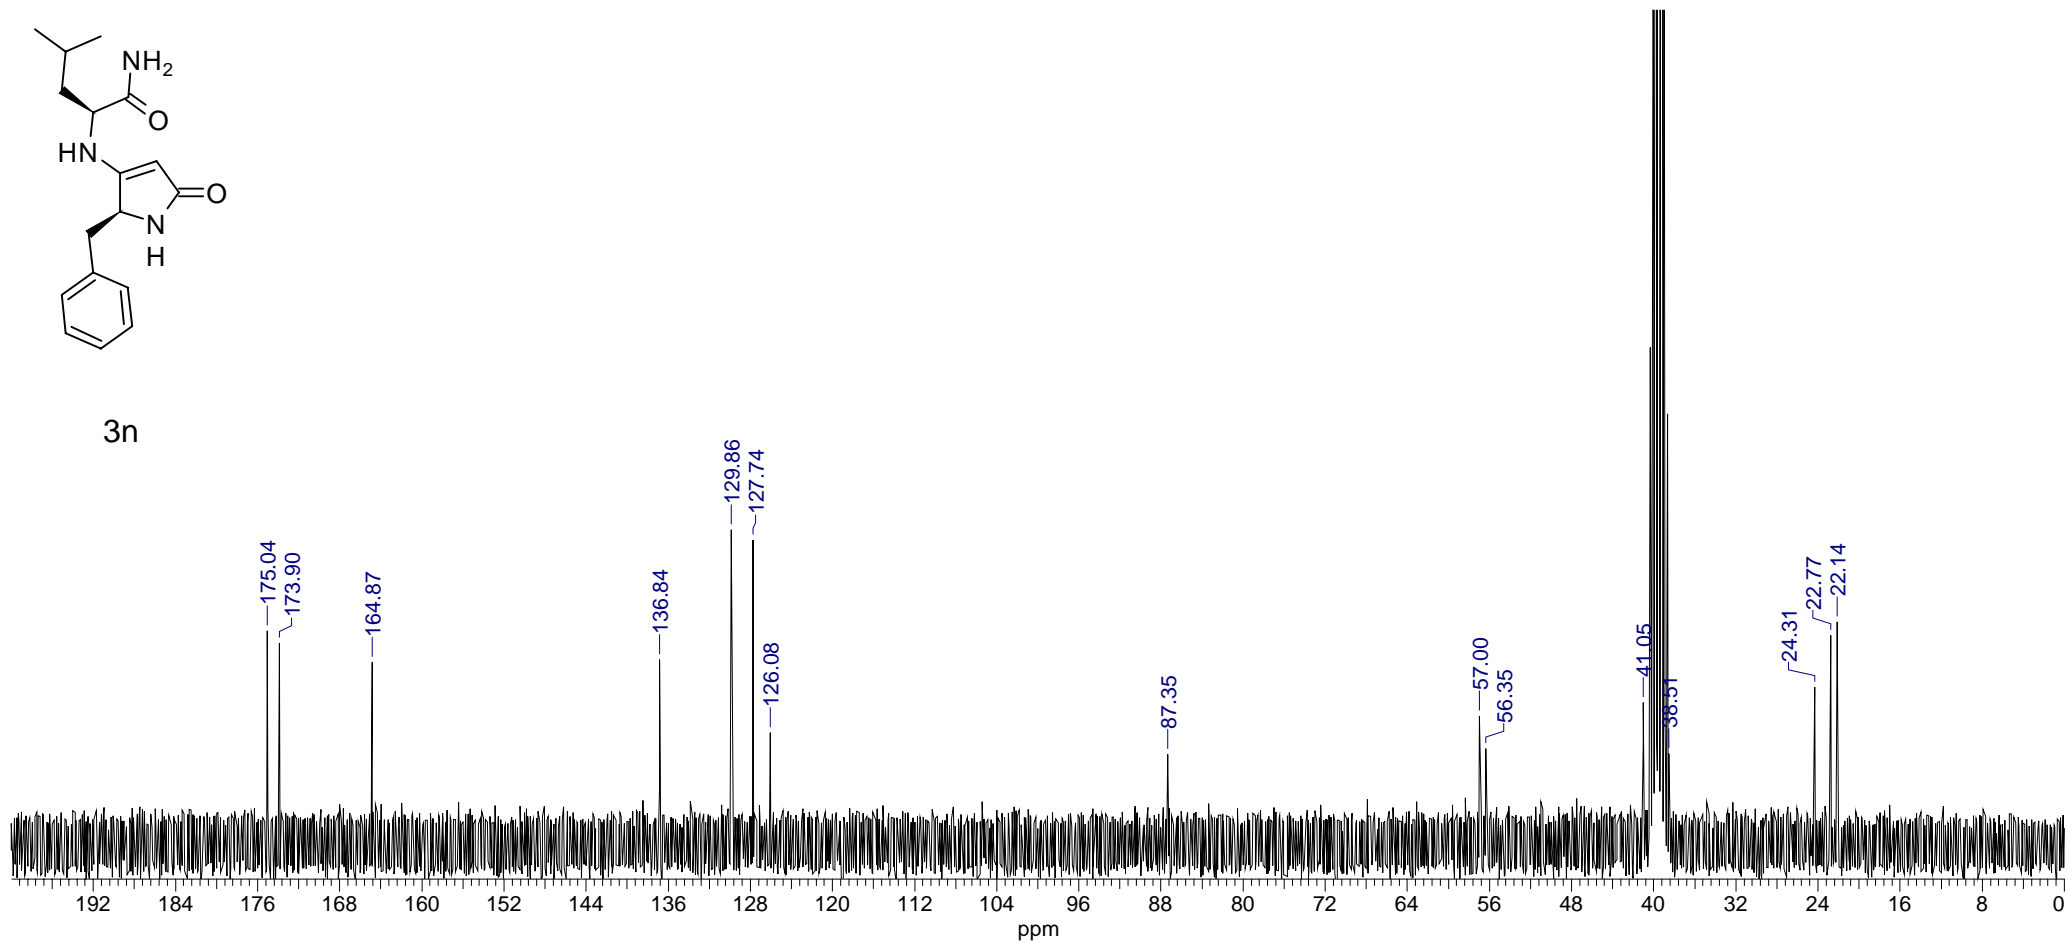

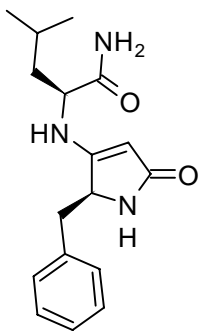

3n

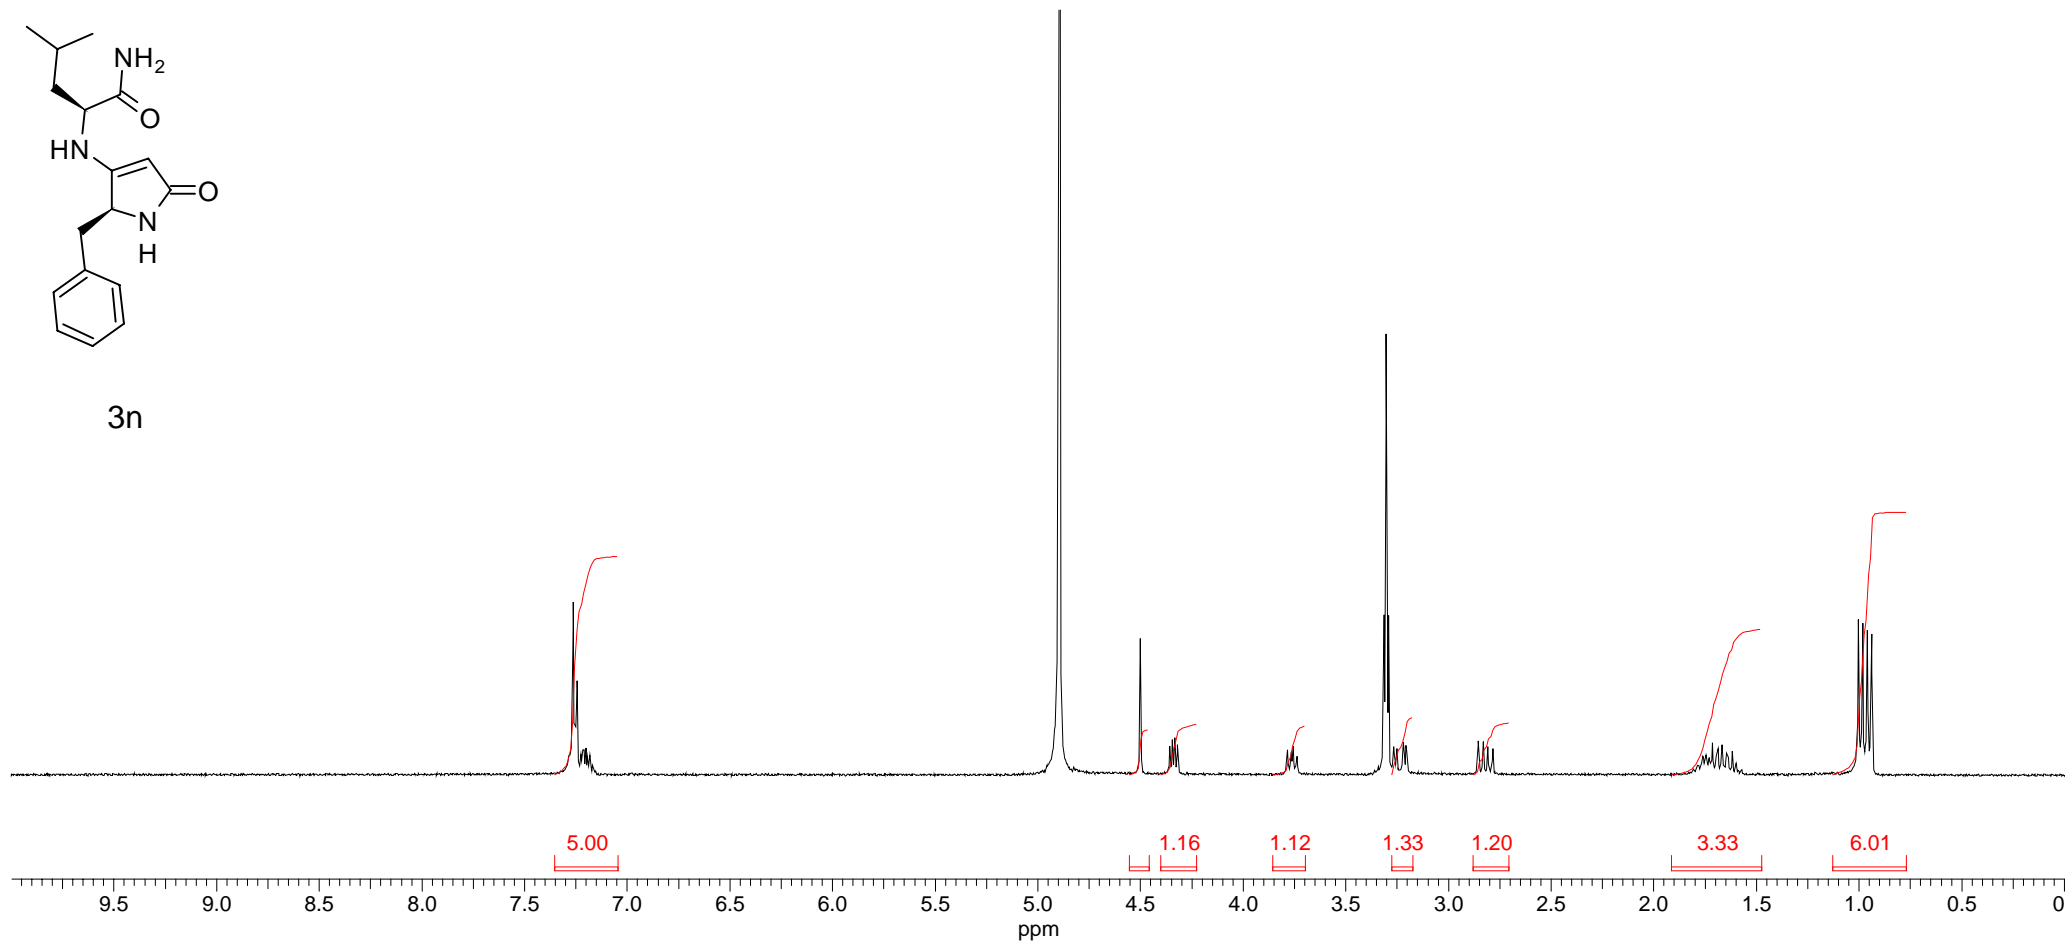

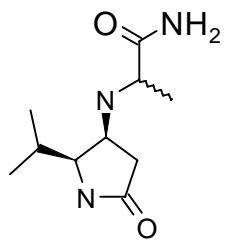

4g/4d mixture

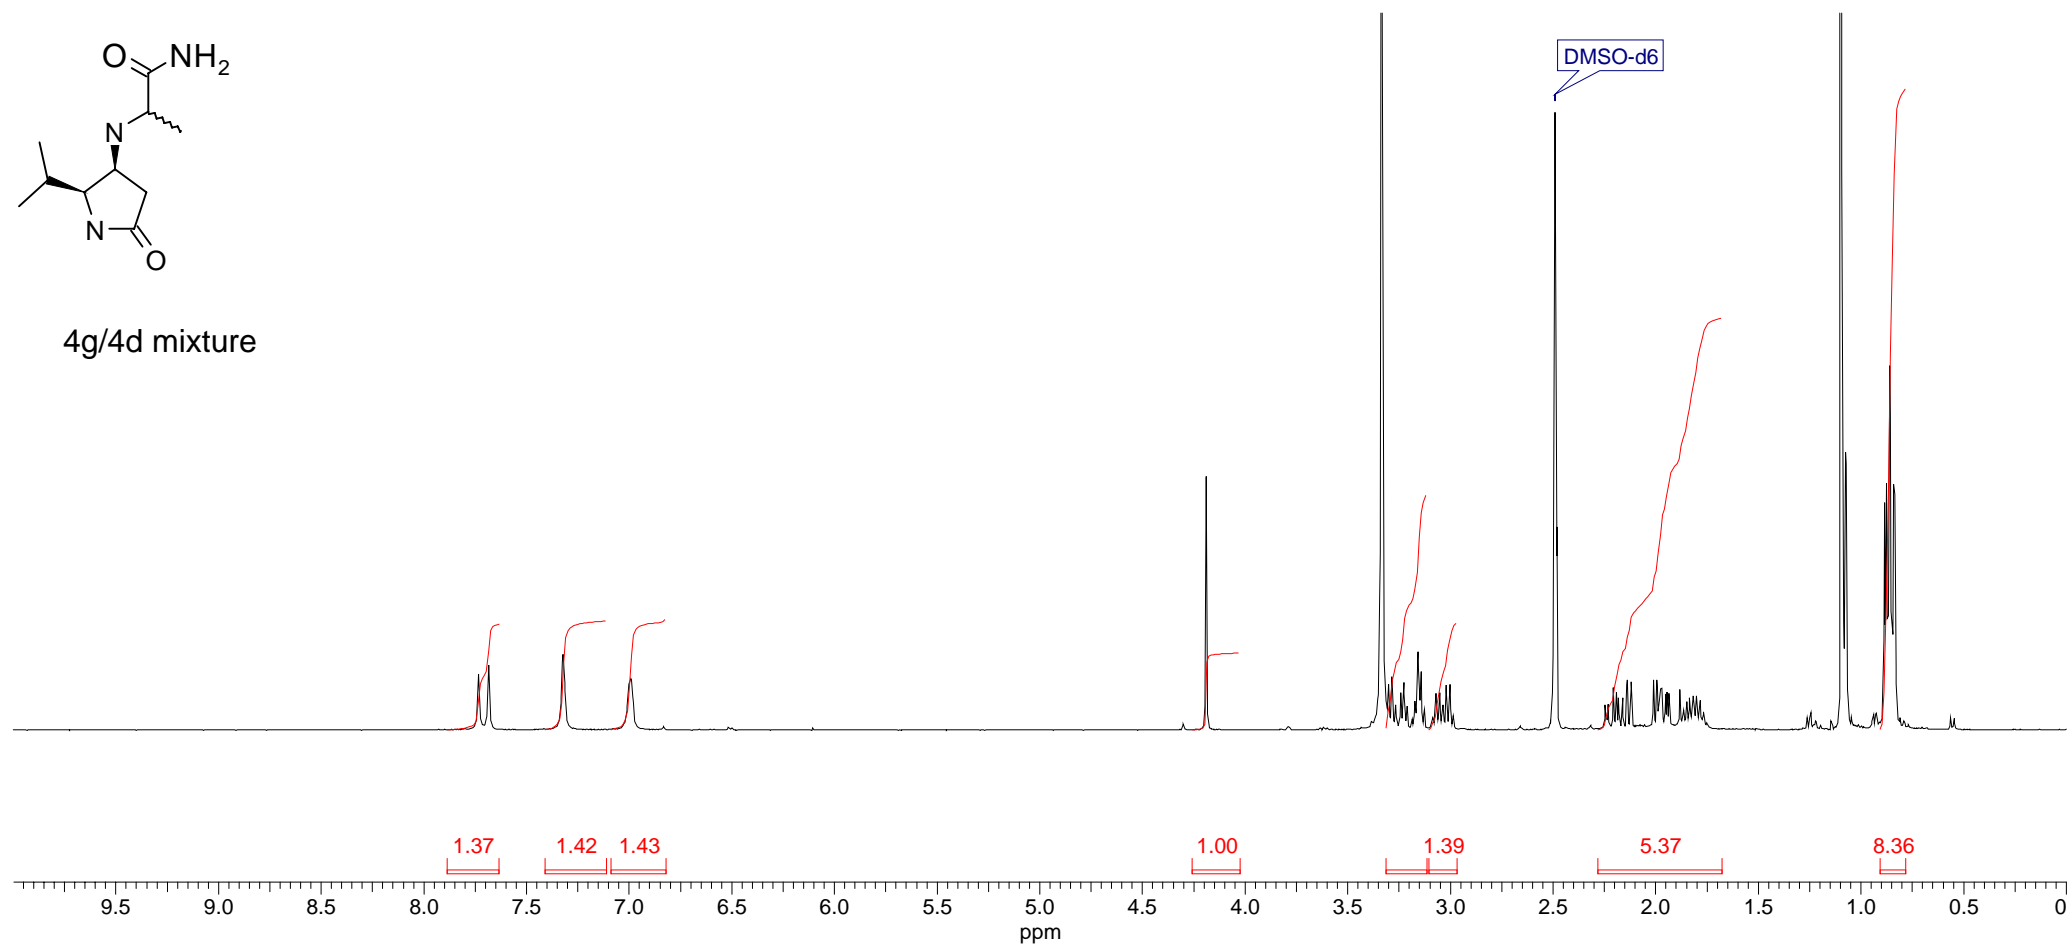

Supplement: b705093c(2).pdf [file b705093c%282%29.pdf]
